# Supplementary material for: A Transcriptomic Study of Maternal Thyroid Adaptation to Pregnancy in Rats
Source: Int J Mol Sci. 2015 Nov 13;16(11):27339–49. doi: 10.3390/ijms161126030 (PMC4661888; doi:10.3390/ijms161126030)
Supplement: Supplementary file 1 [file ijms-16-26030-s001.xlsx]

## Sheet: Table S1
Table S1. The list of differentially expressed genes (fold change > 2 and adjusted pvalue < 0.05).
Up-regualted genes in LP comapred to NP (558 genes):
ID	NP-1	NP-2	NP-3	LP-1	LP-2	LP-3	fold(LP/NP)	pvalue	adjusted-pvalue	Symbol	Title
ENSRNOT00000084002	0.289755	0.537738	0.269583	184.763	170.36	184.128	491.53	0	0	Ckmt2	creatine kinase, mitochondrial 2
ENSRNOT00000024098	0.244025	0.226435	0.68111	151.332	146.199	146.107	385.25	0	0	Actn2	actinin alpha 2
ENSRNOT00000085408	0.752284	0.698057	0.699912	262.002	265.261	243.827	358.6	1.61493e-215	7.76582e-213	Tcap	titin-cap
ENSRNOT00000074366	0.130867	0.121434	0.0608784	34.2392	34.8697	34.3195	330.25	0	0	Cacna1s	calcium channel, voltage-dependent, L type, alpha 1S subunit
ENSRNOT00000048300	0.119948	0.111302	0.111598	36.4507	34.5199	33.3472	304.27	0	0	Xirp2	xin actin-binding repeat containing 2
ENSRNOT00000028781	0.34311	0.159189	0.159612	69.4134	63.2288	68.7513	304.26	1.11806e-243	6.37211e-241	Hfe2	hemochromatosis type 2 (juvenile)
ENSRNOT00000074778	6.69159	6.83016	8.09346	2184.85	1999.18	2020.34	287.04	0	0	Atp2a1	ATPase, Ca++ transporting, cardiac muscle, fast twitch 1
ENSRNOT00000026908	3.05982	0.709814	0.7117	426.393	385.066	376.786	265.15	1.65463e-222	8.48715e-220	Cox6a2	cytochrome c oxidase subunit VIa polypeptide 2
ENSRNOT00000008113	0.469448	0.217805	0.218384	83.5518	78.8334	73.2671	260.21	6.69324e-206	2.94273e-203	Trim54	tripartite motif-containing 54
ENSRNOT00000038038	0.653866	0.121347	0.365007	94.8296	87.946	88.4253	237.85	0	0	Nrap	nebulin-related anchoring protein
ENSRNOT00000079473	0.144964	0.156934	0.0674362	29.6779	28.6224	29.3947	237.44	0	0	Ryr1	ryanodine receptor 1 (skeletal)
ENSRNOT00000017838	0.373436	1.03955	0.347439	139.621	132.57	139.818	234.04	9.01256e-228	4.78225e-225	Myl1	myosin, light chain 1
ENSRNOT00000089066	0.17864	0.0828814	0.0831017	26.152	23.5855	22.3899	209.29	6.44594e-146	1.94491e-143	Txlnb	taxilin beta
ENSRNOT00000087926	0.240744	0.170828	0.0922287	35.4915	32.6719	33.2714	201.34	0	0	Obscn	obscurin, cytoskeletal calmodulin and titin-interacting RhoGEF
ENSRNOT00000040598	1.01495	2.51145	2.51812	419.616	387.569	390.002	198.06	0	0	Tnnt3	troponin T type 3 (skeletal, fast)
ENSRNOT00000073710	0.319955	0.512814	0.270619	75.1077	71.9331	70.985	197.6	0	0	Cmya5	cardiomyopathy associated 5
ENSRNOT00000020348	10.63	6.27695	11.6882	1878.31	1746.91	1790.18	189.38	0	0	Tnnc2	troponin C type 2 (fast)
ENSRNOT00000025606	0.440962	1.63671	0.410264	150.188	143.526	137.995	173.52	6.65112e-201	2.84298e-198	Tnnc1	troponin C type 1 (slow)
ENSRNOT00000027427	0.233517	0.216685	0.217261	40.2655	37.0717	38.4026	173.4	5.12958e-105	1.11175e-102	Art1	ADP-ribosyltransferase 1
ENSRNOT00000028116	1.28545	0.795193	0.398653	144.841	132.856	130.783	164.76	0	0	Hrc	histidine rich calcium binding protein
ENSRNOT00000090388	0.0966108	0.179294	0.17977	24.2457	25.6649	23.6005	161.32	7.84358e-158	2.74311e-155	Trdn	triadin
ENSRNOT00000076187	0.957452	0.444218	1.3362	143.844	151.617	142.933	160.12	3.53273e-188	1.39389e-185	Tnni2	troponin I type 2 (skeletal, fast)
ENSRNOT00000019660	0.26975	0.500611	1.00388	98.7826	90.1665	88.7223	156.5	1.91901e-209	8.9484e-207	Rpl3l	ribosomal protein L3-like
ENSRNOT00000028189	0.101156	0.0938646	0.0941141	14.8519	12.2661	14.6973	144.62	7.4857e-86	1.32402e-83	Kcna7	potassium channel, voltage gated shaker related subfamily A, member 7
ENSRNOT00000070961	0.173791	0.0806318	0.040423	14.5754	13.9336	13.4578	142.33	1.07776e-196	4.36436e-194	Myo18b	myosin XVIIIb
ENSRNOT00000009184	0.169316	0.157112	0.157529	23.125	22.152	22.8434	140.76	4.99289e-85	8.63265e-83	Smyd1	SET and MYND domain containing 1
ENSRNOT00000047453	0.150394	0.139554	0.139925	22.5947	17.1569	20.0504	139.12	5.31813e-58	5.9301e-56	Lmod3	leiomodin 3 (fetal)
ENSRNOT00000076095	0.487383	0.351751	0.503837	61.4811	59.2435	57.1091	132.42	0	0	Neb	nebulin
ENSRNOT00000044969	0.336672	0.312404	0.0783085	34.9177	29.4769	30.9758	131.11	1.42372e-136	3.84355e-134	Myom3	myomesin 3
ENSRNOT00000039437	0.830838	1.02793	1.28833	128.368	138.968	139.729	129.35	4.29309e-289	2.87226e-286	Ankrd23	ankyrin repeat domain 23
ENSRNOT00000010561	0.0891664	0.0827391	0.0829589	9.66645	10.5988	10.108	119.17	8.91413e-72	1.29406e-69	Murc	muscle-related coiled-coil protein
ENSRNOT00000066534	0.0874917	0.0811851	0.0814008	9.70895	8.44544	10.1277	113.09	6.11335e-68	8.1802e-66	Rbfox1	RNA binding protein, fox-1 homolog (C. elegans) 1
ENSRNOT00000067358	0.104622	0.291242	0.389355	32.0613	27.042	26.8939	109.52	5.07758e-101	1.04179e-98	Tbx15	T-box 15
ENSRNOT00000026234	0.16035	0.148792	0.298374	22.1741	23.2815	20.7376	108.96	7.72393e-86	1.35063e-83	Klhl40	kelch-like family member 40
ENSRNOT00000029994	0.303934	0.282026	0.424163	34.6356	35.0362	37.6085	106.21	1.732e-143	5.02869e-141	Trim72	tripartite motif containing 72, E3 ubiquitin protein ligase
ENSRNOT00000085596	0.0482605	0.0447817	0.0449007	5.27307	4.58151	4.73883	105.79	2.26739e-63	2.7473e-61	Ppp1r3a	protein phosphatase 1, regulatory subunit 3A
ENSRNOT00000019679	9.1123	4.22773	2.11948	587.269	526.122	520.126	105.66	1.52018e-200	6.3223e-198	Cox8b	cytochrome c oxidase, subunit VIIIb
ENSRNOT00000025248	0.29992	0.278301	0.13952	27.0097	23.9263	22.0276	101.66	5.52535e-87	1.01219e-84	Ampd1	adenosine monophosphate deaminase 1
ENSRNOT00000010539	0.282985	0.262587	0.263285	23.9145	27.0904	29.3685	99.37	1.48559e-59	1.71881e-57	Abra	actin-binding Rho activating protein
ENSRNOT00000011974	1.21931	1.13142	1.13442	115.531	101.162	121.674	97.09	4.97074e-58	5.58319e-56	Sln	sarcolipin
ENSRNOT00000076973	0.111151	0.103139	0.31024	17.458	15.8722	17.1256	96.19	3.43215e-93	6.60173e-91	Unc45b	unc-45 homolog B (C. elegans)
ENSRNOT00000086599	0.0624318	0.0579316	0.0580855	6.34183	5.22956	5.43259	95.29	7.78251e-57	8.49343e-55	Myh1	myosin, heavy chain 1, skeletal muscle, adult
ENSRNOT00000008244	0.0589285	0.273404	0.219304	17.1531	15.4195	14.9598	86.17	9.55887e-154	3.19765e-151	Klhl31	kelch-like family member 31
ENSRNOT00000072764	0.37382	0.346874	0.347796	32.8671	26.8395	29.2458	83.25	2.20683e-49	2.16297e-47	Mylk4	myosin light chain kinase family, member 4
ENSRNOT00000026089	0.124138	0.11519	0.115496	10.2787	9.50709	8.91914	80.9	6.00605e-48	5.63544e-46	Fsd2	fibronectin type III and SPRY domain containing 2
ENSRNOT00000058843	0.398851	0.370101	0.371084	29.28	34.364	28.3384	80.68	6.75518e-48	6.29992e-46	Tnnt1	troponin T type 1 (skeletal, slow)
ENSRNOT00000010639	0.235028	0.436173	0.218666	26.4823	22.3119	22.3275	79.92	4.69381e-62	5.55603e-60	Stac3	SH3 and cysteine rich domain 3
ENSRNOT00000007601	0.268554	0.249196	0.249858	17.8808	22.9237	19.9383	79.13	5.55236e-47	5.02586e-45	Cav3	caveolin 3
ENSRNOT00000079079	0.128257	0.119012	0.119329	9.19652	9.00399	9.52225	75.62	1.00192e-44	8.96373e-43	Capn3	calpain 3
ENSRNOT00000076054	0.679165	0.315104	0.315942	33.6252	34.4048	30.9047	75.51	1.01173e-59	1.17943e-57	Tnni1	troponin I type 1 (skeletal, slow)
ENSRNOT00000017151	0.326756	0.909609	0.304009	40.1651	39.8828	34.9545	74.66	1.98299e-71	2.82539e-69	Mlf1	myeloid leukemia factor 1
ENSRNOT00000086627	1.04476	1.66192	1.31918	101.795	95.4912	97.8816	73.32	0	0	Ldb3	LIM domain binding 3
ENSRNOT00000044417	0.421768	0.587049	0.196203	30.4223	30.4503	27.4414	73.29	2.02761e-84	3.42867e-82	Jsrp1	junctional sarcoplasmic reticulum protein 1
ENSRNOT00000004965	0.0902516	0.0837461	0.0839686	6.47137	5.9039	5.76394	70.32	2.19489e-41	1.86602e-39	Dusp27	dual specificity phosphatase 27 (putative)
ENSRNOT00000016893	0.909899	1.40719	1.12874	84.9196	73.3136	79.9025	69.11	9.78433e-151	3.13669e-148	Apobec2	apolipoprotein B mRNA editing enzyme, catalytic polypeptide-like 2
ENSRNOT00000036752	0.638582	0.296276	0.891189	42.518	42.0282	41.293	68.91	3.29408e-79	5.12013e-77	Dhrs7c	dehydrogenase/reductase (SDR family) member 7C
ENSRNOT00000089123	0.184443	0.171148	0.171603	11.3359	12.2127	11.6323	66.73	3.19527e-39	2.62935e-37	Kcnj12	potassium channel, inwardly rectifying subfamily J, member 12
ENSRNOT00000026812	2.52592	1.5235	1.64505	131.095	121.911	118.871	65.31	0	0	Actn3	actinin alpha 3
ENSRNOT00000051265	0.113654	0.105462	0.105742	7.47032	6.6188	6.98637	64.88	5.1409e-38	4.09887e-36	Clcn1	chloride channel, voltage-sensitive 1
ENSRNOT00000067635	2.70654	1.88358	3.77718	184.828	171.113	179.876	64.04	3.49999e-153	1.14591e-150	Pvalb	parvalbumin
ENSRNOT00000003340	0.127761	0.355656	0.237734	16.577	13.5557	15.5031	63.28	2.83356e-71	4.00025e-69	Fbxo40	F-box protein 40
ENSRNOT00000048687	0.430258	0.598866	0.80061	38.5639	37.2417	38.699	62.58	3.44572e-293	2.41012e-290	Srl	sarcalumenin
ENSRNOT00000025989	0.383689	0.356031	0.356977	19.3238	22.9567	24.8107	61.18	7.92882e-36	5.92275e-34	Myoz3	myozenin 3
ENSRNOT00000032992	0.226812	0.210463	0.211022	13.3591	11.3993	13.9422	59.7	8.06638e-35	5.74655e-33	Klhl33	kelch-like family member 33
ENSRNOT00000019311	0.434114	0.402822	0.403892	25.569	21.4716	21.8333	55.51	3.461e-32	2.27597e-30	Csrp3	cysteine and glycine-rich protein 3 (cardiac LIM protein)
ENSRNOT00000009969	1.586	1.17734	1.62315	82.4486	78.8246	77.1073	54.34	3.29104e-273	2.0257e-270	Klhl41	kelch-like family member 41
ENSRNOT00000028388	0.120715	0.224028	0.112312	7.52224	6.7411	7.03493	46.6	5.96889e-35	4.27206e-33	Asb16	ankyrin repeat and SOCS box-containing 16
ENSRNOT00000066348	0.213989	0.198564	0.199092	10.5945	8.70626	8.88319	46.08	2.30936e-26	1.3113e-24	Nmrk2	nicotinamide riboside kinase 2
ENSRNOT00000015725	0.224708	0.625532	0.209065	15.9206	14.341	16.8625	44.49	4.8845e-41	4.10725e-39	Dusp26	dual specificity phosphatase 26 (putative)
ENSRNOT00000055243	0.182773	0.169598	0.170049	7.17683	8.16527	7.87918	44.45	1.94722e-25	1.07397e-23	Art5	ADP-ribosyltransferase 5
ENSRNOT00000010027	0.407347	0.377984	0.378988	17.3859	18.8479	13.9832	43.13	1.39608e-24	7.43353e-23	Smpx	small muscle protein, X-linked
ENSRNOT00000025725	0.975008	0.603152	0.302377	28.575	26.7051	24.3887	42.36	1.72449e-47	1.57955e-45	Fitm1	fat storage-inducing transmembrane protein 1
ENSRNOT00000073930	0.187585	0.174064	0.174526	5.6044	7.63202	7.03836	37.81	2.19177e-21	1.06394e-19	Plin5	perilipin 5
ENSRNOT00000079235	0.0914786	0.0848846	0.0851102	2.88924	3.64888	3.21327	37.29	4.77807e-21	2.27631e-19	Mybpc1	myosin binding protein C, slow-type
ENSRNOT00000076213	0.153963	0.142865	0.28649	8.27979	7.61515	5.65391	36.94	3.35966e-25	1.8398e-23	Mlip	muscular LMNA-interacting protein
ENSRNOT00000065674	0.510327	0.473542	0.4748	19.1674	15.0633	19.5553	36.87	9.86679e-21	4.62897e-19	RGD1565323	similar to OTTMUSP00000000621
ENSRNOT00000047152	0.667315	0.92882	1.24172	36.1715	36.2001	32.23	36.86	2.8871e-114	6.63086e-112	Fndc5	fibronectin type III domain containing 5
ENSRNOT00000073370	0.545809	0.578818	0.725446	24.1608	20.7759	21.6619	36	2.18157e-127	5.50328e-125	RGD1564899	similar to chromosome 10 open reading frame 71
ENSRNOT00000020379	0.297708	1.105	0.415474	21.728	21.8499	21.8652	35.99	4.3035e-81	7.12067e-79	Smtnl2	smoothelin-like 2
ENSRNOT00000011554	0.292555	0.271467	0.544376	14.9838	10.5024	12.3782	34.16	7.40139e-25	3.99623e-23	Myoz1	myozenin 1
ENSRNOT00000011255	0.413842	0.384011	0.231019	10.2446	11.5551	12.29	33.13	1.65071e-75	2.4903e-73	Mylk2	myosin light chain kinase 2
ENSRNOT00000067524	0.383284	0.177828	0.534901	12.4327	12.5364	10.8623	32.69	3.31086e-35	2.40319e-33	Trim63	tripartite motif containing 63, E3 ubiquitin protein ligase
ENSRNOT00000077864	0.245178	0.227505	0.228109	7.95292	5.47657	9.39499	32.57	7.99243e-15	2.81436e-13	LOC298139	similar to RIKEN cDNA 2310003M01
ENSRNOT00000004349	0.279073	0.258957	1.29822	18.343	17.1427	22.2788	31.46	1.58297e-38	1.28204e-36	Cacng1	calcium channel, voltage-dependent, gamma subunit 1
ENSRNOT00000078439	0.139805	0.129727	0.390217	8.71179	5.01886	6.91972	31.3	4.73748e-15	1.67973e-13	Lrrc2	leucine rich repeat containing 2
ENSRNOT00000036299	0.132466	0.245834	0.246488	6.2191	7.08024	6.13346	31.1	1.11929e-27	6.62448e-26	Cdnf	cerebral dopamine neurotrophic factor
ENSRNOT00000049349	0.670888	0.124506	0.499347	12.3699	12.7379	13.7109	29.98	6.06102e-53	6.38815e-51	Tmem182	transmembrane protein 182
ENSRNOT00000079442	0.465837	1.29678	0.433407	20.2799	26.757	18.5943	29.89	8.84015e-25	4.75637e-23	Prr33	proline rich 33
ENSRNOT00000086420	0.127537	0.118344	0.237317	4.46357	5.08717	4.47985	29.04	7.87157e-21	3.71558e-19	Kcnc4	potassium channel, voltage gated Shaw-related subfamily C, member 4
ENSRNOT00000000456	0.227808	0.211387	0.211948	6.02826	6.90592	5.63773	28.52	1.12987e-15	4.16941e-14	Vgll2	vestigial-like family member 2
ENSRNOT00000017125	0.136959	0.127087	0.127425	3.39041	4.26114	3.49878	28.48	1.15206e-15	4.24111e-14	Trim55	tripartite motif-containing 55
ENSRNOT00000011956	0.618579	0.803586	0.690618	21.7548	18.8507	18.7652	28.1	1.72675e-84	2.95236e-82	Synpo2l	synaptopodin 2-like
ENSRNOT00000076297	0.796827	0.73939	0.741355	21.0857	22.2486	20.3558	27.96	2.48422e-15	8.95251e-14	Asb12	ankyrin repeat and SOCS box-containing 12
ENSRNOT00000010084	0.669159	0.310462	0.311287	12.5665	13.6125	9.61559	27.73	3.64437e-20	1.65426e-18	Mafa	v-maf avian musculoaponeurotic fibrosarcoma oncogene A
ENSRNOT00000017483	0.277793	0.257769	0.258454	6.87672	6.86994	8.20536	27.65	3.74909e-15	1.33544e-13	Dupd1	dual specificity phosphatase and pro isomerase domain containing 1
ENSRNOT00000014627	0.508898	0.944431	0.47347	17.3761	17.051	18.688	27.57	1.24069e-19	5.48612e-18	Hspb3	heat shock protein B3
ENSRNOT00000005612	0.254271	0.94377	0.473139	14.3253	15.0106	14.8182	26.42	1.50375e-31	9.76359e-30	Eno3	enolase 3, beta, muscle
ENSRNOT00000042952	0.136856	0.126991	0.127329	3.6215	3.82122	2.73136	26.01	3.90372e-14	1.33194e-12	Ano5	anoctamin 5
ENSRNOT00000072480	0.457048	0.424103	1.27569	14.8254	20.4183	19.338	25.31	5.3381e-22	2.65834e-20	Myl4	myosin, light chain 4
ENSRNOT00000001222	0.698308	1.07995	0.866259	25.6317	20.2406	20.2548	25.01	2.95209e-41	2.49597e-39	Phkg1	phosphorylase kinase, gamma 1
ENSRNOT00000025258	0.205284	0.57146	0.572979	11.5654	11.955	9.66901	24.59	4.98654e-29	3.05709e-27	Ankrd1	ankyrin repeat domain 1
ENSRNOT00000055888	0.0603877	0.336209	0.224735	5.46408	4.81747	4.82085	24.31	7.29564e-44	6.45203e-42	Xirp1	xin actin-binding repeat containing 1
ENSRNOT00000066639	0.487395	0.226131	0.226732	7.28084	7.19321	7.97645	23.88	4.52183e-17	1.80732e-15	Asb5	ankyrin repeat and SOCS box-containing 5
ENSRNOT00000083590	0.11535	0.107035	0.10732	2.75701	2.85266	1.9338	22.88	2.95942e-12	8.91185e-11	Agbl1	ATP/GTP binding protein-like 1
ENSRNOT00000028458	0.40283	0.373793	0.374787	7.90883	8.35537	9.96916	22.78	3.09268e-12	9.27684e-11	Myl3	myosin, light chain 3, alkali; ventricular, skeletal, slow
ENSRNOT00000084594	5.21106	14.5063	11.6065	243.17	230.911	238.511	22.75	0	0	Fhl1	four and a half LIM domains 1
ENSRNOT00000076010	0.258614	0.239973	0.24061	4.19438	6.39564	6.19367	22.71	3.21549e-12	9.62644e-11	Popdc3	popeye domain containing 3
ENSRNOT00000015898	1.14985	0.906922	0.802352	22.5261	20.6851	21.6176	22.67	4.95431e-181	1.85944e-178	Alpk3	alpha-kinase 3
ENSRNOT00000040169	0.238891	0.221671	0.22226	5.30194	4.95499	4.95847	22.28	6.54965e-12	1.91245e-10	Asb18	ankyrin repeat and SOCS box-containing 18
ENSRNOT00000041515	0.289755	0.268869	0.269583	6.67817	4.39193	6.70817	21.47	2.07385e-11	5.85549e-10	Asb11	ankyrin repeat and SOCS box containing 11, E3 ubiquitin protein ligase
ENSRNOT00000058956	0.154487	0.143351	0.143732	3.16494	3.08107	2.83657	20.57	6.81886e-11	1.84733e-09	Sbk2	SH3 domain binding kinase family, member 2
ENSRNOT00000014925	0.134128	0.12446	0.124791	1.94639	3.21005	2.67691	20.43	7.27922e-11	1.95826e-09	Crhr2	corticotropin releasing hormone receptor 2
ENSRNOT00000030135	9.9229	9.74925	10.8613	218.111	196.388	209.107	20.42	1.64445e-284	1.05437e-281	Adck3	aarF domain containing kinase 3
ENSRNOT00000016841	0.522134	0.387598	0.388628	8.5129	8.91386	8.83675	20.23	1.16765e-82	1.95301e-80	Scn4a	sodium channel, voltage-gated, type IV, alpha subunit
ENSRNOT00000077227	0.171231	0.317777	0.637244	9.20844	6.28364	6.69814	19.7	4.2644e-18	1.79291e-16	Rxrg	retinoid X receptor gamma
ENSRNOT00000092133	9.64403	8.42246	8.70875	184.016	164.507	176.171	19.6	8.42271e-220	4.18092e-217	Scn1b	sodium channel, voltage-gated, type I, beta subunit
ENSRNOT00000059823	0.151208	0.140309	0.140682	3.48499	2.77442	2.17281	19.51	3.1004e-10	7.79557e-09	Lsmem1	leucine-rich single-pass membrane protein 1
ENSRNOT00000074096	2.06842	1.49281	1.7106	33.9395	34.652	31.9243	19.07	3.04432e-71	4.25872e-69	Tuba8	tubulin, alpha 8
ENSRNOT00000066810	0.10643	0.0987586	0.297063	3.54317	3.31131	2.71888	19.06	2.25547e-30	1.43418e-28	Nos1	nitric oxide synthase 1, neuronal
ENSRNOT00000044232	0.211744	0.196481	0.197003	3.07272	4.39193	4.05693	19.04	4.98322e-10	1.2368e-08	Pitx2	paired-like homeodomain 2
ENSRNOT00000026473	0.137738	0.511238	0.512597	7.28967	8.35099	6.15767	18.77	8.64772e-27	4.98394e-25	Cyp1a1	cytochrome P450, family 1, subfamily a, polypeptide 1
ENSRNOT00000054948	0.223053	0.206975	0.415049	5.71204	4.09266	6.05426	18.77	1.09095e-12	3.41211e-11	Myadml2	myeloid-associated differentiation marker-like 2
ENSRNOT00000006562	0.0411778	0.114629	0.191556	1.9684	2.06954	2.39972	18.53	1.92706e-26	1.10237e-24	Akap6	A kinase (PRKA) anchor protein 6
ENSRNOT00000030152	1.10571	1.73632	1.8992	29.4772	28.7017	28.5861	18.3	6.15868e-156	2.106e-153	Scn4b	sodium channel, voltage-gated, type IV, beta subunit
ENSRNOT00000067400	0.553049	0.513184	0.514547	12.2744	10.5888	5.7396	18.09	1.46392e-07	2.81937e-06	A930018M24Rik	RIKEN cDNA A930018M24 gene
ENSRNOT00000080930	0.228094	0.846608	0.212214	6.61994	6.91459	9.28662	17.73	3.25311e-17	1.31734e-15	Neu2	sialidase 2
ENSRNOT00000022827	0.855955	2.7799	0.398183	24.1117	27.3137	19.8164	17.66	1.02276e-27	6.07655e-26	Pla2g2a	phospholipase A2, group IIA (platelets, synovial fluid)
ENSRNOT00000026883	1.49484	1.68432	1.49012	26.2495	27.3427	27.8734	17.45	9.75683e-118	2.30982e-115	Sypl2	synaptophysin-like 2
ENSRNOT00000064070	0.35456	0.329002	0.197926	4.29774	5.54391	5.26474	17.14	5.27275e-35	3.79145e-33	Ank1	ankyrin 1, erythrocytic
ENSRNOT00000009903	4.95572	4.04668	4.61072	80.206	71.004	70.4208	16.28	6.88406e-125	1.68146e-122	Smtnl1	smoothelin-like 1
ENSRNOT00000005381	1.28773	0.995752	1.9968	25.0989	23.114	20.5602	16.07	2.04456e-50	2.02979e-48	Sgca	sarcoglycan, alpha
ENSRNOT00000065421	0.487722	0.150855	0.302512	4.99593	4.669	5.3212	15.92	1.34637e-15	4.90948e-14	Clip4	CAP-GLY domain containing linker protein family, member 4
ENSRNOT00000004888	0.284759	0.264233	1.58961	10.4522	10.4498	12.0484	15.41	5.7231e-19	2.48777e-17	Itgb1bp2	integrin beta 1 binding protein 2
ENSRNOT00000085161	0.111424	0.413568	0.311001	5.23122	4.35556	3.2912	15.4	1.25652e-15	4.60364e-14	Arpp21	cAMP-regulated phosphoprotein 21
ENSRNOT00000020297	0.126384	0.469095	0.470341	5.17839	5.14199	5.75096	15.08	1.40705e-20	6.5611e-19	Lrrc39	leucine rich repeat containing 39
ENSRNOT00000079961	0.0810332	0.225577	0.301568	2.83602	3.36153	2.97574	15.08	1.77303e-18	7.57873e-17	Klhl38	kelch-like family member 38
ENSRNOT00000088312	5.02088	5.39459	4.17962	77.1462	75.6817	66.2415	15.01	1.81853e-109	4.05559e-107	Tmod4	tropomodulin 4
ENSRNOT00000019639	0.23173	0.860106	1.29359	11.2751	12.0162	12.0246	14.8	2.92547e-24	1.54168e-22	Sgcg	sarcoglycan, gamma
ENSRNOT00000018227	0.834335	0.387097	1.5525	12.1074	14.9759	13.3213	14.57	6.80758e-16	2.53644e-14	Pgam2	phosphoglycerate mutase 2 (muscle)
ENSRNOT00000073796	14.7606	11.8204	11.4755	188.653	177.759	184.341	14.47	0	0	Adssl1	adenylosuccinate synthase like 1
ENSRNOT00000041533	0.242074	0.224625	0.675665	5.9925	5.02102	5.41104	14.38	2.33634e-11	6.56052e-10	Camk2a	calcium/calmodulin-dependent protein kinase II alpha
ENSRNOT00000013661	4.06435	4.14852	5.29397	71.1225	62.9018	58.4034	14.25	2.07569e-66	2.63972e-64	Ddit4l2	DNA-damage-inducible transcript 4-like 2
ENSRNOT00000058143	7.51081	9.46788	8.70195	125.868	121.475	118.11	14.23	0	0	Atp1a2	ATPase, Na+/K+ transporting, alpha 2 polypeptide
ENSRNOT00000046091	0.371147	0.344394	0.345309	4.43544	6.51387	4.1481	14.23	3.20735e-07	5.9607e-06	Tceal7	transcription elongation factor A (SII)-like 7
ENSRNOT00000085517	0.409489	1.7732	3.80982	25.9829	29.0738	29.748	14.15	1.1305e-90	2.12148e-88	Asb2	Ankyrin repeat and SOCS box protein 2
ENSRNOT00000075424	1.99692	2.17524	2.01946	29.5712	29.5062	28.5565	14.15	2.88459e-143	8.22e-141	Plin4	perilipin 4
ENSRNOT00000023256	4.3498	4.43988	5.12617	66.5874	63.1554	65.9777	14.06	2.17361e-186	8.36186e-184	Slc2a4	solute carrier family 2 (facilitated glucose transporter), member 4
ENSRNOT00000022820	0.554738	0.772126	0.774178	8.52358	9.73599	10.1857	13.54	2.18221e-16	8.47976e-15	Slc25a34	solute carrier family 25, member 34
ENSRNOT00000024005	0.211068	0.391707	0.392748	5.4952	3.78856	4.04397	13.39	2.66919e-17	1.08948e-15	Ucp3	uncoupling protein 3 (mitochondrial, proton carrier)
ENSRNOT00000064060	7.56285	11.5402	8.28726	129.115	117.18	119.275	13.35	5.60996e-208	2.539e-205	Tmem38a	transmembrane protein 38a
ENSRNOT00000054959	0.460524	0.427328	0.428463	6.28976	4.40862	6.61758	13.15	1.389e-06	2.35916e-05	Ppp1r27	protein phosphatase 1, regulatory subunit 27
ENSRNOT00000016567	1.8435	1.53955	1.71516	23.6045	22.6482	20.1622	13.03	6.54703e-53	6.85345e-51	Pkia	protein kinase (cAMP-dependent, catalytic) inhibitor alpha
ENSRNOT00000004279	1.16959	0.361761	1.45089	14.6429	11.5076	12.4494	12.94	6.50748e-30	4.08723e-28	Mpz	myelin protein zero
ENSRNOT00000089448	0.161061	0.298902	0.149848	3.29961	2.05579	2.44297	12.79	4.18958e-08	8.60737e-07	Troap	Protein LOC100912795; RCG50654
ENSRNOT00000027237	1.13056	4.72079	4.9963	43.7035	43.7426	44.1278	12.13	0	0	Flnc	filamin C, gamma
ENSRNOT00000085619	0.511225	0.474375	0.237818	5.01848	4.58812	4.89742	11.86	2.80474e-17	1.14178e-15	Mreg	melanoregulin
ENSRNOT00000060811	0.691443	1.2832	0.643307	8.55828	11.3079	10.4878	11.59	1.5714e-13	5.15579e-12	Adamtsl5	ADAMTS-like 5
ENSRNOT00000023865	0.82021	0.761087	0.25437	8.63511	5.45273	6.98439	11.48	6.00815e-12	1.76438e-10	Fbp2	fructose-1,6-bisphosphatase 2
ENSRNOT00000073330	0.378099	0.350845	0.351777	4.84126	3.01631	4.52763	11.46	1.26197e-05	0.000187444	Apod	apolipoprotein D
ENSRNOT00000083531	0.45123	0.837409	0.839634	8.08871	7.37942	8.46526	11.25	2.56381e-30	1.62353e-28	Thbs4	thrombospondin 4
ENSRNOT00000025408	0.301788	0.140017	0.421168	3.60655	3.73168	2.28876	11.16	5.61655e-10	1.39175e-08	Sh3rf2	SH3 domain containing ring finger 2
ENSRNOT00000076708	0.573866	0.443751	0.711888	6.77641	6.40927	6.032	11.11	9.41008e-29	5.72341e-27	Lynx1	Ly6/neurotoxin 1
ENSRNOT00000016843	1.87175	0.217103	0.21768	9.18708	8.39924	7.47123	10.86	4.70219e-16	1.77346e-14	Shox2	short stature homeobox 2
ENSRNOT00000068139	0.0691048	0.448865	0.578646	4.36518	4.07953	3.42038	10.82	2.45451e-24	1.29794e-22	Fhod3	formin homology 2 domain containing 3
ENSRNOT00000010343	0.0979388	0.0908792	0.0911207	0.919623	1.40636	0.703675	10.82	2.69054e-05	0.000376687	Mybl2	myeloblastosis oncogene-like 2
ENSRNOT00000028401	14.9779	22.649	19.0964	201.725	209.766	196.628	10.72	1.782e-257	1.05467e-254	Hspb6	heat shock protein, alpha-crystallin-related, B6
ENSRNOT00000051317	6.70193	7.05922	8.59469	82.7206	73.5505	82.2782	10.67	1.34631e-142	3.76672e-140	Hspb7	heat shock protein B7
ENSRNOT00000023944	0.497063	0.461234	0.462459	3.8187	5.94803	5.15857	10.51	3.91063e-05	0.000528794	Mylpf	myosin light chain, phosphorylatable, fast skeletal muscle
ENSRNOT00000005168	0.121462	0.225413	0.169509	1.81443	2.18018	1.40599	10.46	3.73591e-13	1.20017e-11	Lgi2	leucine-rich repeat LGI family, member 2
ENSRNOT00000023365	0.132514	0.122962	0.123289	1.58362	0.951424	1.37524	10.32	5.3785e-05	0.000707648	Prkag3	protein kinase, AMP-activated, gamma 3 non-catalytic subunit
ENSRNOT00000087026	8.1281	7.29357	8.06086	81.925	80.4118	77.4733	10.21	0	0	Pde4dip	phosphodiesterase 4D interacting protein
ENSRNOT00000085730	0.243698	0.226131	0.226732	1.45617	3.11058	2.52912	10.19	5.68209e-05	0.000743504	Kbtbd12	kelch repeat and BTB (POZ) domain containing 12
ENSRNOT00000089392	0.671012	2.33491	1.56075	16.3244	16.9959	12.9902	10.14	1.6927e-32	1.13249e-30	Ache	acetylcholinesterase
ENSRNOT00000007219	1.8058	1.31657	1.44008	14.3136	15.5378	16.2695	10.11	5.36678e-48	5.06651e-46	Egln3	egl-9 family hypoxia-inducible factor 3
ENSRNOT00000027232	0.401643	0.496922	0.622803	4.34275	5.55383	5.23709	9.95	3.79632e-16	1.43533e-14	Klhl30	kelch-like family member 30
ENSRNOT00000019392	0.463165	1.07445	0.430921	5.13974	7.38986	7.02529	9.93	2.30602e-12	6.98523e-11	Chac1	ChaC glutathione-specific gamma-glutamylcyclotransferase 1
ENSRNOT00000022309	11.2752	10.2937	9.81349	109.132	96.042	102.788	9.81	1.64101e-142	4.50927e-140	Got1	glutamic-oxaloacetic transaminase 1, soluble
ENSRNOT00000011940	0.10532	0.097728	0.0979877	1.34854	1.09225	0.50447	9.78	0.000198271	0.00229571	Slco5a1	solute carrier organic anion transporter family, member 5A1
ENSRNOT00000081837	0.0920347	0.256202	0.685021	4.1638	3.52422	2.27766	9.64	5.2678e-09	1.1851e-07	Cacng6	Voltage-dependent calcium channel gamma-6 subunit
ENSRNOT00000038222	0.206685	0.383574	0.384594	3.35217	3.79235	2.145	9.53	6.30551e-07	1.11914e-05	Pla2g7	phospholipase A2, group VII (platelet-activating factor acetylhydrolase, plasma)
ENSRNOT00000048030	1.10764	1.38529	0.985722	11.6748	10.2577	11.1876	9.52	4.16168e-86	7.4465e-84	Usp13	ubiquitin specific peptidase 13
ENSRNOT00000076953	2.18099	0.607134	1.21749	12.2874	11.6573	14.1031	9.5	6.81651e-24	3.56777e-22	Asb10	ankyrin repeat and SOCS box-containing 10
ENSRNOT00000051916	0.587	0.544688	1.09227	7.01501	6.08768	7.96639	9.47	1.84636e-10	4.71173e-09	Scgb3a1	secretoglobin, family 3A, member 1
ENSRNOT00000020803	0.243534	0.22598	0.22658	2.28673	2.33137	1.94417	9.43	0.000159876	0.00188953	Cdca3	cell division cycle associated 3
ENSRNOT00000033352	0.263013	0.610137	0.122352	3.25543	3.0424	3.04453	9.38	2.59666e-10	6.58277e-09	Cdh15	cadherin 15
ENSRNOT00000003224	0.223327	0.207229	0.20778	2.09699	1.95977	1.78285	9.15	0.000227282	0.00258112	Sgcd	sarcoglycan, delta
ENSRNOT00000020524	0.265803	0.493287	0.989196	5.89924	5.5132	4.45609	9.08	1.09556e-08	2.36114e-07	Nt5c1a	5'-nucleotidase, cytosolic IA
ENSRNOT00000017995	0.180953	0.671637	0.168355	3.39821	2.74277	3.0336	8.99	1.65562e-07	3.17665e-06	Asb14	ankyrin repeat and SOCS box-containing 14
ENSRNOT00000047388	0.0634124	0.0588415	0.0589979	0.433038	0.505876	0.6581	8.81	0.000329475	0.00356287	Adamts20	ADAM metallopeptidase with thrombospondin type 1 motif, 20
ENSRNOT00000088376	1.97546	4.27715	3.55334	26.0812	31.6238	27.8611	8.73	2.75667e-67	3.59488e-65	Pfkm	6-phosphofructo-1-kinase, M-type
ENSRNOT00000009329	0.0792828	0.147136	0.0737634	0.744447	0.822228	1.01268	8.59	4.09048e-05	0.000550212	Atp1b4	ATPase, (Na+)/K+ transporting, beta 4 polypeptide
ENSRNOT00000087445	0.348039	0.968855	0.161905	4.45637	3.60946	4.3066	8.37	7.77202e-10	1.91048e-08	Kcnq4	potassium voltage-gated channel, subfamily Q, member 4
ENSRNOT00000010007	1.30312	2.82144	3.6372	22.9888	20.2716	21.4995	8.34	9.53723e-37	7.41206e-35	Fhl3	four and a half LIM domains 3
ENSRNOT00000074395	4.68104	5.4054	6.2908	43.7763	45.3929	46.5873	8.29	3.79012e-145	1.12158e-142	Gpc1	glypican 1
ENSRNOT00000003339	0.237021	0.659808	1.1026	4.85579	5.86163	5.67652	8.2	1.60741e-09	3.80536e-08	Trim7	tripartite motif-containing 7
ENSRNOT00000010939	1.1958	6.49912	4.29128	27.9979	33.116	36.8213	8.17	4.3112e-32	2.82301e-30	Jph2	junctophilin 2
ENSRNOT00000000676	2.87425	3.11158	2.56273	26.4774	22.1652	21.1291	8.16	1.62762e-41	1.39144e-39	Lrrc20	leucine rich repeat containing 20
ENSRNOT00000026860	9.68496	59.1892	57.3269	318.716	357.671	342.592	8.07	1.62275e-89	3.00854e-87	Des	desmin
ENSRNOT00000004377	0.140074	0.129978	0.130323	1.1957	1.2292	0.782765	8.01	0.000918617	0.00891278	Spata20	spermatogenesis associated 20
ENSRNOT00000056229	0.647688	0.601001	0.602598	4.97589	3.10018	6.72177	7.99	0.000923524	0.00895475	Nkain1	Na+/K+ transporting ATPase interacting 1
ENSRNOT00000031163	0.0996307	0.0924491	0.0926947	0.68037	0.874291	0.71583	7.97	0.000931136	0.00901719	Cdca2	cell division cycle associated 2
ENSRNOT00000078992	1.33893	2.17423	2.49144	16.2868	16.1557	15.0981	7.92	2.53066e-34	1.77008e-32	Cap2	CAP, adenylate cyclase-associated protein, 2 (yeast)
ENSRNOT00000035977	0.336906	0.937863	0.470178	5.32038	4.83784	3.63092	7.9	7.61648e-11	2.0383e-09	Ip6k3	inositol hexaphosphate kinase 3
ENSRNOT00000022528	4.5067	7.14399	5.2412	45.0419	43.2928	44.0727	7.84	3.48818e-80	5.59125e-78	Rtn2	reticulon 2
ENSRNOT00000075349	0.129261	0.119944	0.601312	2.20679	2.37173	2.06382	7.81	3.42357e-07	6.33195e-06	Foxg1	forkhead box G1
ENSRNOT00000086579	0.185953	0.345099	0.519024	2.38099	3.11526	2.67209	7.78	2.65287e-06	4.35206e-05	Slc47a1	solute carrier family 47 (multidrug and toxin extrusion), member 1
ENSRNOT00000047678	1.95667	2.905	2.73068	18.7067	16.7021	23.4306	7.75	1.55105e-22	7.79988e-21	Masp1	mannan-binding lectin serine peptidase 1
ENSRNOT00000004923	0.083954	0.0779024	0.0781094	0.64498	0.602774	0.603196	7.71	0.00130139	0.0120922	Fam184b	family with sequence similarity 184, member B
ENSRNOT00000007672	0.465837	0.864517	0.433407	3.97646	3.71624	5.57828	7.52	0.000226549	0.00257469	Lrrc3b	leucine rich repeat containing 3B
ENSRNOT00000001973	0.470868	0.145642	0.146029	2.81358	1.50255	1.3783	7.47	0.000220218	0.00251388	Fzd9	frizzled class receptor 9
ENSRNOT00000004383	0.277722	0.171802	0.344517	2.29166	1.47703	2.1432	7.45	1.57808e-08	3.36337e-07	Cacng4	calcium channel, voltage-dependent, gamma subunit 4
ENSRNOT00000038408	0.664995	0.740472	0.49496	4.5412	5.09283	4.45935	7.42	2.04371e-13	6.66284e-12	Relt	RELT tumor necrosis factor receptor
ENSRNOT00000059127	36.6847	35.9315	37.9231	279.098	249.453	264.038	7.17	2.36609e-160	8.46732e-158	Cryab	crystallin, alpha B
ENSRNOT00000003024	0.278859	0.258758	0.259446	1.90431	1.55723	2.22617	7.14	0.00257674	0.0219551	Yipf7	Yip1 domain family, member 7
ENSRNOT00000074223	0.30229	0.14025	0.281246	0.903139	1.44692	2.77522	7.08	0.00373878	0.0300117	Hspa1l	heat shock protein 1-like
ENSRNOT00000016947	46.0741	38.3938	38.664	316.025	271.129	276.656	7.02	6.01923e-80	9.54886e-78	Eef1a2	eukaryotic translation elongation factor 1 alpha 2
ENSRNOT00000047627	1.46832	1.6769	0.945763	9.25574	9.82142	9.55781	7	3.78871e-29	2.33203e-27	Adcy2	adenylate cyclase 2 (brain)
ENSRNOT00000029508	1.39216	1.46405	1.29524	9.82383	10.5877	8.59468	6.99	2.40261e-35	1.77747e-33	Mn1	meningioma 1
ENSRNOT00000003921	0.175618	1.30367	0.326784	3.89766	4.0629	4.62655	6.97	4.24994e-09	9.64573e-08	Alb	albumin
ENSRNOT00000091240	0.693422	0.643438	0.645148	4.73532	4.42545	4.42856	6.86	0.00360202	0.0291113	Arx	aristaless related homeobox
ENSRNOT00000042914	1.10498	1.53799	1.02805	8.56762	8.22735	8.38014	6.86	8.14568e-31	5.22274e-29	Cacna2d1	calcium channel, voltage-dependent, alpha2/delta subunit 1
ENSRNOT00000072682	0.695546	2.19439	1.81195	9.49965	11.4304	11.3274	6.86	2.4468e-26	1.38424e-24	Rbm24	RNA binding motif protein 24
ENSRNOT00000083569	0.903863	0.838711	0.84094	4.62931	6.48956	6.49411	6.82	0.00364854	0.0294254	Tmem233	transmembrane protein 233
ENSRNOT00000023065	0.225966	0.838711	0.42047	3.27909	3.42505	3.42745	6.82	4.89809e-06	7.76228e-05	Ankle1	ankyrin repeat and LEM domain containing 1
ENSRNOT00000043719	0.641967	0.595692	0.597275	2.73996	6.14559	3.58744	6.8	0.0036746	0.0296046	Hbe1	hemoglobin, epsilon 1
ENSRNOT00000008764	4.73284	4.99055	5.40412	37.462	31.2349	33.833	6.78	1.9755e-51	2.01318e-49	Rbm38	RNA binding motif protein 38
ENSRNOT00000081607	3.37791	2.45671	2.46323	19.2489	18.4262	18.0019	6.71	1.02905e-64	1.27702e-62	Camk2b	calcium/calmodulin-dependent protein kinase type II subunit beta isoform 3
ENSRNOT00000025770	0.527108	0.326075	0.163471	3.4496	1.26151	2.10399	6.7	0.00136618	0.0126413	Ifit1	interferon-induced protein with tetratricopeptide repeats 1
ENSRNOT00000035385	0.748256	0.555456	0.696165	3.83234	4.77541	4.77875	6.69	5.47589e-11	1.49402e-09	Dok7	docking protein 7
ENSRNOT00000075042	1.46728	1.73284	0.992827	8.53975	9.78993	9.47734	6.63	1.33989e-23	6.96563e-22	Aldh1l1	aldehyde dehydrogenase 1 family, member L1
ENSRNOT00000006964	0.2291	0.637759	0.213151	2.73789	2.01043	2.37763	6.6	0.000206355	0.00237323	Asf1b	anti-silencing function 1B histone chaperone
ENSRNOT00000083552	0.0458548	0.0425494	0.0426625	0.273996	0.40239	0.183033	6.56	0.00505486	0.0386217	Scn1a	sodium channel, voltage-gated, type I, alpha
ENSRNOT00000010260	0.145632	0.405405	0.135494	1.36746	1.97505	1.16261	6.56	0.000210494	0.00241692	Acox2	acyl-CoA oxidase 2, branched chain
ENSRNOT00000027525	0.616898	0.858646	0.430464	4.73934	3.81404	3.93984	6.55	7.17383e-10	1.76625e-08	Kif22	kinesin family member 22
ENSRNOT00000007358	0.120196	0.223064	0.111829	1.02601	0.767098	1.15145	6.47	0.0011887	0.0111807	Adamts8	ADAM metallopeptidase with thrombospondin type 1 motif, 8
ENSRNOT00000013507	3.14351	3.43167	2.06447	18.6256	16.9642	19.9285	6.43	1.62203e-32	1.08995e-30	Ppapdc3	phosphatidic acid phosphatase type 2 domain containing 3
ENSRNOT00000090320	0.879523	1.63225	1.12515	7.78928	7.36727	7.19691	6.15	6.79554e-22	3.36237e-20	Aqp4	aquaporin 4
ENSRNOT00000038093	0.415894	0.643193	0.257961	1.89341	2.54366	3.65216	6.14	2.418e-06	3.99519e-05	Mstn	myostatin
ENSRNOT00000083848	0.39292	0.455747	0.639742	2.93477	2.97782	3.21516	6.13	9.02048e-11	2.39323e-09	Uhrf1	ubiquitin-like with PHD and ring finger domains 1
ENSRNOT00000017054	1.98674	17.4111	14.5821	65.7637	72.0265	68.3763	6.07	3.89545e-43	3.38662e-41	Pdlim3	PDZ and LIM domain 3
ENSRNOT00000055271	2.81487	4.13562	3.27364	21.2249	19.4617	21.1607	6.05	1.19097e-27	7.02173e-26	Ppp1r1a	protein phosphatase 1, regulatory (inhibitor) subunit 1A
ENSRNOT00000082303	0.125467	0.116423	0.350198	1.07101	1.40129	1.10179	6.04	0.000555774	0.00566374	Ube2c	ubiquitin-conjugating enzyme E2C
ENSRNOT00000020908	4.55991	2.67235	2.90274	21.3058	19.5287	20.3088	6.03	5.79618e-27	3.36572e-25	Nol3	nucleolar protein 3 (apoptosis repressor with CARD domain)
ENSRNOT00000007309	0.24526	0.113791	0.456372	1.57018	1.56526	1.76216	6.01	3.36734e-05	0.000460391	Best3	bestrophin 3
ENSRNOT00000064981	3.80474	4.41311	9.73465	38.9734	34.1466	34.4237	5.99	1.3395e-34	9.41197e-33	Sh3bgr	SH3 domain binding glutamate-rich protein
ENSRNOT00000033123	0.111492	0.0517278	0.155596	0.475857	0.667077	0.756551	5.96	0.000137341	0.00164723	Gas2l3	growth arrest-specific 2 like 3
ENSRNOT00000017363	0.26197	0.121544	0.121867	0.894488	1.14944	0.941108	5.91	0.00228128	0.0196475	Spsb4	splA/ryanodine receptor domain and SOCS box containing 4
ENSRNOT00000014704	127.314	136.956	147.54	839.365	799.494	790.386	5.9	0	0	Slc25a4	solute carrier family 25 (mitochondrial carrier; adenine nucleotide translocator), member 4
ENSRNOT00000084128	0.220414	0.511316	0.717745	3.10446	2.46172	2.99132	5.9	6.20396e-09	1.38157e-07	Kif18b	kinesin family member 18B
ENSRNOT00000034704	1.55219	1.04749	1.18156	7.70892	5.62849	8.44865	5.76	4.10115e-14	1.39312e-12	Lrrc14b	leucine rich repeat containing 14B
ENSRNOT00000018739	0.740027	0.915578	0.229503	3.57962	3.93574	3.1508	5.66	2.15676e-05	0.000307869	Gfod1	glucose-fructose oxidoreductase domain containing 1
ENSRNOT00000077542	0.13108	0.121631	0.487818	1.56648	1.0457	1.56965	5.65	0.000346939	0.00372294	Oas2	2'-5' oligoadenylate synthetase 2
ENSRNOT00000025043	20.986	19.2236	16.8966	114.488	103.777	104.387	5.65	3.39177e-127	8.41815e-125	Rabep2	rabaptin, RAB GTPase binding effector protein 2
ENSRNOT00000013960	5.29476	5.52724	3.69462	28.813	25.3436	27.4748	5.62	3.21899e-13	1.03627e-11	Hspb2	heat shock protein B2
ENSRNOT00000082711	1.07184	1.82339	0.332407	7.62448	5.13039	5.2766	5.59	9.14557e-09	1.98774e-07	Srpk3	serine/arginine-rich protein specific kinase 3
ENSRNOT00000026261	7.10908	6.96312	6.98163	42.1418	39.069	36.4164	5.59	3.65999e-56	3.96619e-54	Hhatl	hedgehog acyltransferase-like
ENSRNOT00000085620	0.838292	0.777866	0.693274	4.85003	4.23543	3.79226	5.58	1.49753e-14	5.20181e-13	Slc38a4	solute carrier family 38, member 4
ENSRNOT00000021746	0.105534	0.195853	0.098187	0.630597	0.757712	0.842493	5.58	0.00436603	0.0341732	Gucy2g	guanylate cyclase 2G
ENSRNOT00000000178	2.12861	0.790068	0.99021	7.44974	5.77357	8.4965	5.56	3.46266e-11	9.56614e-10	Pfkfb1	6-phosphofructo-2-kinase/fructose-2,6-biphosphatase 1
ENSRNOT00000023671	0.177505	0.16471	0.330296	0.757606	1.84088	1.13364	5.55	0.00441906	0.0344773	Vstm2b	V-set and transmembrane domain containing 2B
ENSRNOT00000022133	0.291733	0.135352	0.135712	0.99611	1.39639	0.698684	5.49	0.00431252	0.0338404	Cep55	centrosomal protein 55
ENSRNOT00000052035	5.89221	3.8728	6.39569	32.9025	26.6364	29.007	5.48	8.25585e-35	5.85443e-33	Art3	ADP-ribosyltransferase 3
ENSRNOT00000010183	6.05854	5.32594	4.89509	30.2134	30.017	28.8288	5.47	1.45512e-98	2.90797e-96	Padi2	peptidyl arginine deiminase, type II
ENSRNOT00000019931	1.66475	9.75631	8.72249	33.8061	37.675	38.5408	5.46	6.56364e-36	4.92689e-34	Synpo2	synaptopodin 2
ENSRNOT00000074384	0.330021	0.612464	0.614092	3.66224	2.10621	2.63461	5.4	0.00191847	0.0169663	Prr32	proline rich 32
ENSRNOT00000066277	0.127851	0.237271	0.118951	0.654814	0.815952	1.12272	5.36	0.00600548	0.0445146	Melk	maternal embryonic leucine zipper kinase
ENSRNOT00000050914	3.65903	4.0126	3.50746	19.8762	18.664	20.536	5.28	8.7528e-49	8.36572e-47	Sema6c	sema domain, transmembrane domain (TM), and cytoplasmic domain, (semaphorin) 6C
ENSRNOT00000044376	2.98783	3.08051	2.00765	15.0193	15.2283	11.6611	5.19	1.61239e-23	8.32597e-22	Mapk12	mitogen-activated protein kinase 12
ENSRNOT00000075648	0.869266	3.22643	0.80875	9.64624	9.70847	5.55159	5.08	0.00119223	0.0112071	Csap1	common salivary protein 1
ENSRNOT00000027234	1.89931	3.1181	2.85453	12.4714	12.3546	15.1625	5.08	1.63824e-25	9.06805e-24	Slc16a1	solute carrier family 16 (monocarboxylate transporter), member 1
ENSRNOT00000018581	1.19919	0.834559	1.67355	5.37412	7.65326	5.74397	5.06	6.97188e-07	1.22609e-05	Bpifa1	BPI fold containing family A, member 1
ENSRNOT00000035580	0.861366	0.266426	0.534267	3.79892	2.74864	1.83371	5.04	6.58466e-05	0.000849327	Fam78a	family with sequence similarity 78, member A
ENSRNOT00000035758	0.623648	0.651031	0.72529	2.9945	2.79855	4.29411	5.04	3.22993e-10	8.10803e-09	Sec31b	SEC31 homolog B (S. cerevisiae)
ENSRNOT00000085344	0.780146	1.08587	0.846808	3.82918	4.77147	4.82672	4.95	2.01691e-19	8.89289e-18	Top2a	topoisomerase (DNA) II alpha
ENSRNOT00000084120	1.81746	1.427	1.56087	9.06981	6.58028	7.9242	4.91	5.31118e-16	1.99338e-14	RGD1307461	similar to RIKEN cDNA 6430571L13 gene; similar to g20 protein
ENSRNOT00000010224	18.0718	25.1537	22.1635	110.322	101.792	105.58	4.86	1.27645e-92	2.42493e-90	Ptp4a3	protein tyrosine phosphatase type IVA, member 3
ENSRNOT00000042287	16.584	19.1317	15.4294	89.7842	77.9495	80.8667	4.86	1.97132e-72	2.88902e-70	Bin1	bridging integrator 1
ENSRNOT00000017174	33.1367	30.3211	27.4043	158.519	140.436	139.065	4.82	2.66012e-73	3.97417e-71	Nqo1	NAD(P)H dehydrogenase, quinone 1
ENSRNOT00000016826	2.27332	0.703153	1.76255	5.49821	8.16101	8.77168	4.73	2.27755e-06	3.77255e-05	Shisa2	shisa family member 2
ENSRNOT00000007352	15.8138	14.8425	20.8009	83.9412	83.3785	76.3267	4.73	2.74878e-103	5.79429e-101	Phospho1	phosphatase, orphan 1
ENSRNOT00000089243	0.898833	2.29362	2.29971	10.5498	7.70828	7.5343	4.7	1.08368e-10	2.84567e-09	Grb14	growth factor receptor bound protein 14
ENSRNOT00000012700	0.524319	0.486525	1.95127	4.0281	5.43762	4.18572	4.61	0.00297423	0.0247525	Fgf7	fibroblast growth factor 7
ENSRNOT00000001540	1.6203	2.25526	3.26626	11.7565	10.3409	10.6715	4.59	4.50408e-21	2.15245e-19	Tmprss3	transmembrane protease, serine 3
ENSRNOT00000002558	0.476841	1.03243	0.147882	2.98495	2.15562	2.41091	4.56	4.34138e-05	0.000579323	P2rx6	purinergic receptor P2X, ligand-gated ion channel, 6
ENSRNOT00000036728	13.478	10.9646	12.8833	59.8893	52.8772	56.8939	4.55	1.44683e-71	2.08072e-69	Slc25a12	solute carrier family 25 (aspartate/glutamate carrier), member 12
ENSRNOT00000021156	0.636717	0.787761	0.394927	3.98575	1.52383	2.71094	4.52	0.00235329	0.0202417	Ccna2	cyclin A2
ENSRNOT00000076408	14.6126	13.9641	14.0012	66.836	59.8525	62.5062	4.44	1.43388e-66	1.83871e-64	Mef2c	myocyte enhancer factor 2C
ENSRNOT00000029167	1.44188	2.94348	2.4147	10.0926	9.89229	10.1294	4.43	1.21295e-09	2.89828e-08	Mamstr	MEF2 activating motif and SAP domain containing transcriptional regulator
ENSRNOT00000000783	2.44888	1.13618	1.424	7.57771	6.83764	7.57555	4.39	4.53218e-07	8.28281e-06	Cdk1	cyclin-dependent kinase 1
ENSRNOT00000090918	1.04943	1.25201	1.34833	5.20423	5.18261	5.58518	4.38	2.70465e-26	1.52451e-24	Amot	angiomotin
ENSRNOT00000032388	0.66957	0.207102	0.830609	2.66726	2.49271	2.31629	4.38	0.000799673	0.00786788	Nog	noggin
ENSRNOT00000022032	0.205749	4.2002	5.55134	12.4698	16.4138	14.29	4.34	1.30581e-10	3.39422e-09	Fxyd6	FXYD domain-containing ion transport regulator 6
ENSRNOT00000001935	1.03593	1.92252	1.44572	5.96894	6.71467	6.2025	4.29	1.16441e-12	3.63446e-11	Sh2b2	SH2B adaptor protein 2
ENSRNOT00000038589	0.250805	0.349089	0.29168	0.856362	1.20048	1.75194	4.27	6.72424e-05	0.000866605	Iqgap3	IQ motif containing GTPase activating protein 3
ENSRNOT00000076850	4.21772	4.84831	4.68548	20.5271	18.079	19.4486	4.22	4.35993e-67	5.63786e-65	Phka1	phosphorylase kinase, alpha 1
ENSRNOT00000022522	1.05728	0.899316	0.573813	3.61005	3.30353	3.72787	4.21	1.17186e-10	3.06155e-09	Extl1	exostosin-like glycosyltransferase 1
ENSRNOT00000005881	0.342248	0.635155	0.106141	1.55812	1.54717	1.45718	4.21	0.000298656	0.00329207	Ston2	stonin 2
ENSRNOT00000088473	545.284	524.658	523.918	2312.52	2205.51	2145.22	4.18	3.24057e-232	1.78093e-229	Aldoa	aldolase A, fructose-bisphosphate
ENSRNOT00000021308	0.161275	0.748251	0.300096	2.34034	1.28658	1.41623	4.17	0.00187116	0.0166096	Fam83d	family with sequence similarity 83, member D
ENSRNOT00000026941	2.27075	3.20641	3.55173	12.6414	12.2605	12.5581	4.15	1.87064e-79	2.93729e-77	Speg	SPEG complex locus
ENSRNOT00000017314	0.159482	0.295972	0.247299	1.13447	0.933003	0.84878	4.15	2.39424e-05	0.000337695	Espl1	extra spindle pole bodies homolog 1 (S. cerevisiae)
ENSRNOT00000010680	1.91815	2.16129	2.03956	9.23942	8.0883	7.87521	4.12	4.31322e-15	1.53284e-13	Prkaa2	protein kinase, AMP-activated, alpha 2 catalytic subunit
ENSRNOT00000004525	0.324777	0.502277	0.268593	1.26296	1.52577	1.7285	4.12	8.53352e-11	2.27187e-09	Cenpf	centromere protein F
ENSRNOT00000028624	14.316	23.4052	23.4674	80.887	79.4007	90.3409	4.1	3.6755e-28	2.1922e-26	Fxyd1	FXYD domain-containing ion transport regulator 1
ENSRNOT00000022716	0.434373	1.00766	0.808267	3.89327	2.2524	2.94752	4.04	0.000313868	0.0034327	Pla2g5	phospholipase A2, group V
ENSRNOT00000074683	10.7949	11.7218	10.0434	48.6224	42.8754	39.6051	4.03	3.03569e-35	2.2139e-33	Twf2	twinfilin actin-binding protein 2
ENSRNOT00000035692	0.0527516	0.465017	0.368094	1.03568	1.32561	1.2002	4.02	4.06976e-11	1.12031e-09	Dmd	dystrophin
ENSRNOT00000027012	2.69817	7.92831	7.53099	20.7288	27.2647	24.4119	3.99	5.55139e-13	1.76497e-11	Ramp1	receptor (G protein-coupled) activity modifying protein 1
ENSRNOT00000078946	9.63105	18.6861	10.5898	56.8011	39.1146	59.412	3.99	2.71146e-09	6.24609e-08	Slfn3	Protein Slfn3; Schlafen 3, isoform CRA_b; Schlafen-4
ENSRNOT00000075933	0.635603	0.393191	0.788473	1.44683	3.21136	2.53706	3.96	0.00116854	0.0110114	Hsf4	heat shock transcription factor 4
ENSRNOT00000041407	1.0786	0.875745	0.250878	2.76213	2.36626	3.55188	3.94	5.58777e-06	8.75607e-05	Plcd4	phospholipase C, delta 4
ENSRNOT00000017532	1.11686	1.15151	2.42459	6.24988	6.23689	5.94407	3.93	5.9632e-12	1.75453e-10	Prc1	protein regulator of cytokinesis 1
ENSRNOT00000083344	4.23415	9.16754	8.02468	27.1745	28.2736	28.5438	3.92	4.53737e-38	3.63651e-36	Nexn	nexilin (F actin binding protein)
ENSRNOT00000052312	0.460329	0.854295	1.99865	3.92944	4.16194	4.89984	3.92	2.5118e-07	4.72513e-06	Nusap1	nucleolar and spindle associated protein 1
ENSRNOT00000002597	6.07221	5.63451	4.19155	22.2382	17.9702	21.5794	3.89	1.61002e-23	8.32597e-22	Tbx1	T-box 1
ENSRNOT00000065128	20.5922	20.957	25.4934	86.3298	83.8601	89.6196	3.88	1.35564e-98	2.74481e-96	Crat	carnitine O-acetyltransferase
ENSRNOT00000082846	1.13124	1.46957	0.63149	3.09005	4.69274	4.69603	3.86	3.44392e-05	0.000469814	Ccnb1	G2/mitotic-specific cyclin-B1
ENSRNOT00000058817	1.29351	1.25743	0.802307	4.5218	4.27504	4.08134	3.84	4.84927e-16	1.82446e-14	Acsl6	acyl-CoA synthetase long-chain family member 6
ENSRNOT00000013228	5.44027	5.18097	5.32794	19.3089	20.2153	21.601	3.83	1.18781e-30	7.58422e-29	Tmod1	tropomodulin 1
ENSRNOT00000013785	27.4108	26.1744	28.1715	106.381	105.649	98.344	3.8	3.04939e-116	7.1097e-114	Pgm1	phosphoglucomutase 1
ENSRNOT00000035814	1.48872	2.26945	1.68188	7.08012	6.70164	6.87612	3.8	9.34461e-15	3.28299e-13	Vldlr	very low density lipoprotein receptor
ENSRNOT00000065349	1.11166	2.79986	1.03427	5.96469	6.4612	6.33895	3.79	1.67474e-09	3.95259e-08	Kifc1	kinesin family member C1
ENSRNOT00000085499	0.318312	0.147684	0.888456	1.90201	1.52361	1.65174	3.75	0.00259624	0.0220723	Hmmr	hyaluronan mediated motility receptor (RHAMM)
ENSRNOT00000006098	5.45475	3.5121	3.72858	16.4394	15.3637	15.8188	3.75	3.29607e-30	2.07869e-28	Cacnb1	calcium channel, voltage-dependent, beta 1 subunit
ENSRNOT00000026156	0.30049	0.111532	0.279571	0.718209	1.1027	0.767636	3.74	0.000334929	0.00361422	P2rx5	purinergic receptor P2X, ligand-gated ion channel, 5
ENSRNOT00000010320	2.09829	1.23312	2.01728	6.62717	6.58408	6.5887	3.7	1.92633e-20	8.79596e-19	Ppp2r3a	protein phosphatase 2, regulatory subunit B'', alpha
ENSRNOT00000011386	10.43	9.90328	11.058	41.6174	36.185	37.9531	3.69	1.57108e-32	1.06034e-30	Barx2	BARX homeobox 2
ENSRNOT00000085923	1.48375	2.44763	2.14737	7.03638	6.83897	8.55471	3.69	1.67861e-10	4.31226e-09	Epdr1	ependymin related 1
ENSRNOT00000060696	1.55894	2.44804	2.34297	7.37023	7.55759	8.42449	3.68	2.29511e-14	7.91863e-13	Prob1	proline rich basic protein 1
ENSRNOT00000048043	0.110914	0.411675	0.412769	1.04145	1.50419	0.885441	3.67	0.00345551	0.0280815	Cacna2d3	calcium channel, voltage-dependent, alpha2/delta subunit 3
ENSRNOT00000010994	0.435675	0.808541	0.567483	1.71073	2.29391	2.64333	3.67	1.97816e-06	3.30869e-05	Arhgap11a	Rho GTPase activating protein 11A
ENSRNOT00000005400	1.07501	0.99752	1.37523	4.2441	4.28797	4.07643	3.66	1.33377e-07	2.58815e-06	Dusp10	dual specificity phosphatase 10
ENSRNOT00000010406	0.178071	0.495705	0.165674	1.14003	1.13646	0.781861	3.64	0.00204012	0.0178472	Bub1b	BUB1 mitotic checkpoint serine/threonine kinase B
ENSRNOT00000042394	0.347595	0.107513	0.431196	0.989042	0.924321	1.29496	3.62	0.00571447	0.0426658	Fgfr4	fibroblast growth factor receptor 4
ENSRNOT00000025934	4.20061	5.02614	5.45088	17.3624	17.1963	18.179	3.59	1.15785e-31	7.54957e-30	Synpo	synaptopodin
ENSRNOT00000013553	3.84365	2.13995	1.66883	9.62426	9.4033	8.38708	3.58	1.91381e-08	4.06352e-07	Magix	MAGI family member, X-linked
ENSRNOT00000026013	1.45925	0.541625	0.271532	2.24215	3.25955	2.56287	3.55	0.00568143	0.0424894	Pitx3	paired-like homeodomain 3
ENSRNOT00000078996	2.54489	3.67336	3.68312	10.379	11.0533	12.8669	3.46	5.40702e-09	1.21288e-07	Akr1b8	aldo-keto reductase family 1, member B8
ENSRNOT00000000889	0.503027	0.777946	0.936016	1.8607	3.21034	2.5433	3.43	0.000468094	0.00486034	Tmem119	transmembrane protein 119
ENSRNOT00000034672	0.300168	0.417796	0.279271	0.704626	1.31703	1.37786	3.41	0.000469123	0.00486774	Col22a1	collagen, type XXII, alpha 1
ENSRNOT00000030449	3.36828	3.90686	7.44275	15.0949	15.4506	19.4949	3.4	1.14274e-08	2.45936e-07	Dusp23	dual specificity phosphatase 23
ENSRNOT00000011930	2.57567	3.24358	2.22519	9.89383	8.95286	8.51852	3.4	1.57355e-10	4.05592e-09	Plbd1	phospholipase B domain containing 1
ENSRNOT00000043660	2.07307	2.44827	2.9808	9.97414	8.26903	7.07122	3.37	1.66691e-09	3.94016e-08	Rtp4	receptor (chemosensory) transporter protein 4
ENSRNOT00000031951	3.15763	5.02289	5.45593	15.4023	15.8338	14.5845	3.36	1.29609e-13	4.26159e-12	Apol9a	apolipoprotein L 9a
ENSRNOT00000047530	16.0926	10.217	13.9216	45.5485	43.4688	45.7531	3.35	1.06555e-29	6.6653e-28	Coq10a	coenzyme Q10 homolog A (S. cerevisiae)
ENSRNOT00000060097	0.653513	0.404271	1.01336	2.23139	2.60672	2.08684	3.34	0.00448716	0.0348553	Crlf1	cytokine receptor-like factor 1
ENSRNOT00000024885	1.14352	1.94533	1.46288	4.71794	4.48522	5.97181	3.33	6.13832e-14	2.05788e-12	Tln2	talin 2
ENSRNOT00000024362	33.6561	32.4629	30.283	108.491	107.397	104.468	3.32	2.08363e-78	3.20629e-76	Phyh	phytanoyl-CoA 2-hydroxylase
ENSRNOT00000025629	1.29943	0.602882	1.05785	3.32764	4.14651	2.33405	3.31	6.30755e-05	0.00081495	Plk1	polo-like kinase 1
ENSRNOT00000011163	0.430853	0.666327	0.801718	2.81967	1.37486	2.06374	3.3	0.000962026	0.00926966	LOC100359539	ribonucleotide reductase M2 polypeptide
ENSRNOT00000011699	2.08957	3.01614	2.16011	9.7112	6.11221	8.15533	3.3	1.92733e-07	3.66598e-06	Gja3	gap junction protein, alpha 3
ENSRNOT00000016797	0.112065	0.2773	0.208527	0.573964	0.774807	0.626244	3.3	0.000223914	0.0025504	Aspm	asp (abnormal spindle) homolog, microcephaly associated (Drosophila)
ENSRNOT00000036151	2.66268	3.61109	2.09619	8.04258	7.84308	11.6094	3.28	1.2808e-07	2.4885e-06	Cdc20	cell division cycle 20
ENSRNOT00000065497	130.63	115.918	136.875	420.588	422.66	409.288	3.27	1.45746e-169	5.33987e-167	Pink1	PTEN induced putative kinase 1
ENSRNOT00000009028	5.31639	3.91888	3.83684	14.4627	14.0316	14.2397	3.27	4.05251e-49	3.8975e-47	Sptb	spectrin, beta, erythrocytic
ENSRNOT00000001632	4.20282	1.77267	0.710952	8.15362	6.70565	7.01537	3.27	0.000100651	0.00124403	Lrrc3	leucine rich repeat containing 3
ENSRNOT00000064983	0.4792	0.333493	0.445839	1.32942	1.52914	1.2433	3.26	0.00345987	0.0280953	Iqub	IQ motif and ubiquitin domain containing
ENSRNOT00000079726	0.30721	0.570132	0.285823	1.50788	1.34793	0.919691	3.25	0.000458042	0.00477208	Kif11	kinesin family member 11
ENSRNOT00000029593	1.94735	2.33845	3.19727	8.21367	7.67618	8.1388	3.21	2.22157e-13	7.19696e-12	Rcan2	regulator of calcineurin 2
ENSRNOT00000002771	2.31763	1.19476	0.718762	4.39637	3.69781	5.34503	3.18	0.000276825	0.00307566	Dnajc28	DnaJ (Hsp40) homolog, subfamily C, member 28
ENSRNOT00000021716	28.7699	28.8713	23.9912	83.1348	83.4749	92.5503	3.17	3.99741e-64	4.88192e-62	Coq9	coenzyme Q9
ENSRNOT00000032015	83.7887	83.7297	85.4514	275.09	261.587	261.771	3.16	5.10866e-53	5.42152e-51	Ifi27l2b	interferon, alpha-inducible protein 27 like 2B
ENSRNOT00000024353	4.72857	3.69492	2.77856	15.5082	8.33864	11.3247	3.14	0.000107872	0.00131845	Doc2g	double C2-like domains, gamma
ENSRNOT00000064429	0.574926	0.133371	0.802352	1.84037	1.14663	1.72115	3.12	0.00566705	0.042456	Adam11	ADAM metallopeptidase domain 11
ENSRNOT00000002465	2.76197	1.80351	2.76004	6.54906	8.56871	7.67641	3.11	7.36562e-14	2.448e-12	Sspn	sarcospan
ENSRNOT00000013238	51.3494	47.648	52.2752	152.62	153.616	162.784	3.1	1.14208e-113	2.58446e-111	Acadm	acyl-CoA dehydrogenase, C-4 to C-12 straight chain
ENSRNOT00000025523	2.61614	3.50648	4.59758	12.4065	10.4352	10.2105	3.08	1.57261e-07	3.02113e-06	Car14	carbonic anhydrase 14
ENSRNOT00000023661	1.0022	1.65326	1.34684	4.27746	3.99755	4.00036	3.07	2.54894e-07	4.78331e-06	Ppargc1b	peroxisome proliferator-activated receptor gamma, coactivator 1 beta
ENSRNOT00000066598	9.77339	7.45665	9.90127	30.4046	25.816	26.5277	3.05	1.21247e-21	5.96088e-20	Smarcd3	SWI/SNF related, matrix associated, actin dependent regulator of chromatin, subfamily d, member 3
ENSRNOT00000030082	1.07873	0.500487	0.501817	1.99512	2.5817	1.72234	3.03	0.00437366	0.0341981	Ppara	peroxisome proliferator activated receptor alpha
ENSRNOT00000027739	3.34118	6.20067	3.10858	10.6953	9.99542	17.3375	3.01	0.00124007	0.0116047	Nrep	neuronal regeneration related protein
ENSRNOT00000019305	1.02803	1.48389	0.850192	4.09521	3.46273	2.55328	3.01	5.45963e-06	8.59026e-05	P2ry1	purinergic receptor P2Y, G-protein coupled, 1
ENSRNOT00000084271	1.30959	2.20945	2.10455	7.3171	4.74881	4.84718	3.01	1.30718e-05	0.000193785	Mcm5	minichromosome maintenance complex component 5
ENSRNOT00000042352	1.95926	1.10184	1.04953	4.40919	4.0733	3.88656	3.01	1.33065e-12	4.11165e-11	Alpk2	alpha-kinase 2
ENSRNOT00000002068	2.73884	3.60034	5.73339	11.6896	14.3841	10.0213	2.99	2.04301e-08	4.32432e-07	Zak	sterile alpha motif and leucine zipper containing kinase AZK
ENSRNOT00000027342	0.643103	3.58048	4.78666	10.9792	8.20863	7.70098	2.98	0.0025634	0.0218535	Scgb1a1	secretoglobin, family 1A, member 1 (uteroglobin)
ENSRNOT00000077440	4.09307	3.10748	3.98122	10.9582	12.4674	9.95121	2.98	6.94605e-11	1.87519e-09	Tmem65	transmembrane protein 65
ENSRNOT00000033112	0.605387	0.786448	0.563242	1.65366	1.83521	2.31979	2.97	0.000956621	0.00923493	C6	complement component 6
ENSRNOT00000041762	0.410878	0.762522	0.509699	1.28602	1.85742	1.85872	2.97	0.00438372	0.0342594	Ube2ql1	ubiquitin-conjugating enzyme E2Q family-like 1
ENSRNOT00000087785	1.28135	0.509564	1.87337	3.59384	4.52689	2.77649	2.97	0.000213582	0.00244721	Homer2	homer scaffolding protein 2
ENSRNOT00000001600	2.99968	4.47774	4.97501	12.0236	12.4853	12.3899	2.96	6.445e-16	2.40718e-14	Oasl2	2'-5' oligoadenylate synthetase-like 2
ENSRNOT00000077679	1.21118	1.12387	0.901487	3.51519	2.51218	3.48084	2.94	0.00329278	0.0269805	St8sia5	ST8 alpha-N-acetyl-neuraminide alpha-2,8-sialyltransferase 5
ENSRNOT00000012755	2.07868	1.92884	1.77925	5.60708	6.63311	4.77919	2.94	5.42475e-12	1.60531e-10	Wipf3	WAS/WASL interacting protein family, member 3
ENSRNOT00000012296	202.622	207.029	203.767	626.158	591.721	581.595	2.93	9.17073e-147	2.87998e-144	Ifi27	interferon, alpha-inducible protein 27
ENSRNOT00000006291	1.09964	1.45768	0.730778	3.88878	2.50642	3.13522	2.9	0.00026025	0.00291677	Prr5l	proline rich 5 like
ENSRNOT00000010247	0.929292	1.10868	1.23514	3.28635	2.43586	3.70934	2.88	7.66818e-05	0.000975997	Frzb	frizzled-related protein
ENSRNOT00000081437	1.42157	1.3191	2.44682	4.79322	4.93318	5.16362	2.87	8.29108e-12	2.40723e-10	Filip1	filamin A interacting protein 1
ENSRNOT00000025092	1.5283	3.42716	1.89587	5.76189	6.90885	7.01537	2.87	4.43823e-09	1.00583e-07	Carns1	carnosine synthase 1
ENSRNOT00000023504	12.1547	7.51906	11.1372	29.3972	29.0896	29.551	2.86	1.15942e-24	6.19483e-23	Irf7	interferon regulatory factor 7
ENSRNOT00000011906	1.89851	1.56592	2.25699	5.67208	5.8899	4.79942	2.86	4.21765e-09	9.58659e-08	Prima1	proline rich membrane anchor 1
ENSRNOT00000042055	70.4826	91.8624	82.7624	242.191	229.919	228.935	2.86	7.63013e-102	1.58666e-99	Ndrg2	NDRG family member 2
ENSRNOT00000043346	5.81498	6.01249	7.7288	19.0041	17.893	19.0993	2.86	6.63124e-18	2.74305e-16	Zbtb47	zinc finger and BTB domain containing 47
ENSRNOT00000077526	5.20094	10.2471	9.3463	20.3735	24.9513	25.3669	2.85	2.27945e-15	8.23385e-14	Ehbp1l1	EH domain binding protein 1-like 1
ENSRNOT00000083067	11.8273	16.3927	11.4218	38.7225	37.5024	36.3335	2.84	3.398e-36	2.57579e-34	Mx2	myxovirus (influenza virus) resistance 2
ENSRNOT00000048407	1.56843	2.10221	1.94566	6.17352	5.49149	4.17367	2.82	8.2353e-09	1.80263e-07	Ksr1	kinase suppressor of ras 1
ENSRNOT00000067016	0.586526	1.36062	1.18234	2.67023	3.58727	2.57528	2.82	1.07271e-05	0.000160261	Igdcc4	immunoglobulin superfamily, DCC subclass, member 4
ENSRNOT00000016833	0.847372	1.57258	1.89211	4.19531	4.05598	3.92353	2.82	9.48573e-05	0.00117905	Ppm1j	protein phosphatase, Mg2+/Mn2+ dependent, 1J
ENSRNOT00000087892	0.490135	2.12242	2.12806	3.34709	5.21344	4.69538	2.8	8.0855e-05	0.00102235	Popdc2	Popeye domain containing 2; Protein Popdc2
ENSRNOT00000089094	16.9791	14.3548	15.446	37.6834	46.0536	47.2908	2.8	4.14869e-18	1.74904e-16	Sgcb	sarcoglycan, beta
ENSRNOT00000064772	1.87601	1.28268	1.37795	4.21418	4.25348	4.17764	2.79	1.37257e-07	2.65341e-06	Reep1	receptor accessory protein 1
ENSRNOT00000091048	89.7624	81.5806	90.9495	257.158	228.068	243.443	2.78	1.6615e-52	1.71592e-50	Ak1	adenylate kinase 1
ENSRNOT00000055536	1.24383	1.87553	1.88051	3.98156	4.46522	5.46132	2.78	1.3344e-05	0.000197251	Gpr157	G protein-coupled receptor 157
ENSRNOT00000032972	0.969976	1.98013	1.8049	4.63672	4.02378	4.49121	2.77	0.00019053	0.00221273	Tacc3	transforming, acidic coiled-coil containing protein 3
ENSRNOT00000067998	6.38021	10.6566	8.01366	23.1465	24.6858	21.3924	2.76	1.41889e-11	4.03583e-10	Acyp2	acylphosphatase 2, muscle type
ENSRNOT00000056174	4.7755	6.16524	6.56798	15.4196	18.0546	14.9179	2.76	2.28895e-12	6.94721e-11	Usp18	ubiquitin specific peptidase 18
ENSRNOT00000039275	7.7876	16.7345	13.3469	32.8882	34.9868	36.811	2.76	2.97029e-19	1.30219e-17	Hspb8	heat shock protein B8
ENSRNOT00000025037	6.14871	8.889	9.16134	20.2719	23.1041	23.1558	2.75	3.47973e-35	2.5139e-33	Svil	supervillin
ENSRNOT00000055735	11.8605	11.763	10.0966	30.7417	31.1817	30.3602	2.74	2.89023e-77	4.40346e-75	Agl	amylo-alpha-1, 6-glucosidase, 4-alpha-glucanotransferase
ENSRNOT00000045224	4.43202	3.16869	4.05588	11.4117	10.0854	10.4404	2.74	1.45286e-21	7.09735e-20	Dtna	dystrobrevin, alpha
ENSRNOT00000071885	1.48207	1.71904	1.83852	4.8496	4.72931	4.23964	2.74	1.41021e-06	2.39253e-05	Racgap1	Rac GTPase-activating protein 1
ENSRNOT00000076511	6.77476	9.32486	9.03448	21.8792	23.0597	24.0223	2.74	9.74757e-53	1.01348e-50	Synm	synemin, intermediate filament protein
ENSRNOT00000071420	1.31056	1.82414	1.52416	4.6147	3.78997	4.31575	2.73	6.86232e-05	0.000882922	Tk1	thymidine kinase 1, soluble
ENSRNOT00000059270	1.25815	1.32312	1.09252	4.2243	3.21182	2.61144	2.73	6.00889e-06	9.32104e-05	Clcn4	chloride channel, voltage-sensitive 4
ENSRNOT00000028685	6.70658	9.00135	10.3623	22.8994	23.5983	24.2841	2.72	1.85421e-27	1.08489e-25	Kcnj11	potassium channel, inwardly rectifying subfamily J, member 11
ENSRNOT00000081108	3.52342	5.31285	5.73674	13.9104	12.4731	13.185	2.72	1.35085e-09	3.22277e-08	Oas1k	2 ' -5 ' oligoadenylate synthetase 1K
ENSRNOT00000026495	4.7587	3.63067	4.13225	12.1863	10.4609	11.3968	2.72	3.4794e-16	1.32527e-14	Afap1l1	actin filament associated protein 1-like 1
ENSRNOT00000038176	0.772309	0.989645	0.992275	2.66841	2.31776	2.46619	2.71	1.26931e-10	3.31052e-09	Mki67	marker of proliferation Ki-67
ENSRNOT00000019759	14.1312	11.4387	13.7069	39.781	32.9803	33.1235	2.7	1.76541e-20	8.13359e-19	Coro6	coronin 6
ENSRNOT00000000750	5.07626	7.18948	5.96572	16.8766	16.1985	16.2098	2.7	8.35864e-10	2.04813e-08	Ube2d1	ubiquitin-conjugating enzyme E2D 1
ENSRNOT00000023014	2.39724	4.44888	4.77933	9.35461	11.2013	10.6623	2.69	1.94942e-05	0.000280091	Fhl2	four and a half LIM domains 2
ENSRNOT00000001401	15.7513	16.775	18.3184	49.0456	42.9803	44.5822	2.69	5.62248e-34	3.89724e-32	Rilpl1	Rab interacting lysosomal protein-like 1
ENSRNOT00000080734	1.65386	2.45543	2.15421	5.36469	5.67332	5.6773	2.67	7.12046e-06	0.000109133	Slc41a3	solute carrier family 41, member 3
ENSRNOT00000019210	0.179036	1.49517	1.58243	2.44524	2.85654	3.35879	2.66	0.000192684	0.00223438	Col24a1	collagen, type XXIV, alpha 1
ENSRNOT00000015776	12.7857	11.3123	11.0657	29.1889	29.1765	34.6565	2.65	2.87654e-15	1.0318e-13	Tcea3	transcription elongation factor A (SII), 3
ENSRNOT00000008153	7.23458	8.90512	7.96723	21.1733	22.1434	20.2731	2.64	5.55126e-20	2.49046e-18	Jph1	junctophilin 1
ENSRNOT00000005521	0.311179	0.481247	0.772042	0.885423	1.82046	1.40771	2.63	0.00632292	0.0464203	Hdac9	histone deacetylase 9
ENSRNOT00000091465	53.0023	49.7743	51.3919	133.005	137.037	135.349	2.63	1.32044e-51	1.35459e-49	Macrod1	MACRO domain containing 1
ENSRNOT00000050649	0.883265	1.33185	0.924497	2.35615	2.20197	3.7019	2.63	0.000306933	0.00337122	Megf11	multiple EGF-like-domains 11
ENSRNOT00000014180	50.173	48.8948	47.7459	136.503	123.915	126.38	2.63	1.83574e-65	2.29662e-63	Car3	carbonic anhydrase 3
ENSRNOT00000036586	0.874496	1.35243	1.62723	3.23476	3.83699	3.0252	2.62	0.000276283	0.00307185	Serhl2	serine hydrolase-like 2
ENSRNOT00000005284	0.469904	1.63512	1.31157	2.9081	2.99895	3.00105	2.61	0.000160891	0.00189716	Cd55	CD55 molecule, decay accelerating factor for complement
ENSRNOT00000048606	0.247853	0.843288	0.691796	1.33995	1.25227	2.04461	2.6	0.00124915	0.0116779	Slc8a3	solute carrier family 8 (sodium/calcium exchanger), member 3
ENSRNOT00000031025	1.96311	1.4904	0.996241	3.96083	4.12876	3.4193	2.59	0.000449688	0.00469776	Ifit3	interferon-induced protein with tetratricopeptide repeats 3
ENSRNOT00000081501	8.27684	14.5924	13.8611	32.9711	33.0145	28.8529	2.58	1.00342e-15	3.72064e-14	Gstm7	glutathione S-transferase, mu 7
ENSRNOT00000038426	2.7836	3.09955	3.97106	6.81156	8.88255	9.77765	2.58	2.6885e-07	5.02071e-06	Oas1a	2'-5' oligoadenylate synthetase 1A
ENSRNOT00000071580	3.11498	2.72042	3.75051	7.03851	8.91674	8.48416	2.55	5.10903e-07	9.26094e-06	Fam160a1	family with sequence similarity 160, member A1
ENSRNOT00000014837	14.5432	15.3926	11.4166	37.8248	28.0984	39.0026	2.54	1.20639e-09	2.88708e-08	Gyg1	glycogenin 1
ENSRNOT00000046369	1.65763	4.153	3.54714	8.34838	6.08298	9.13087	2.52	2.22365e-05	0.000316536	Gypc	glycophorin C (Gerbich blood group)
ENSRNOT00000002255	1.72696	1.60248	2.57078	3.83282	6.19963	4.82532	2.52	6.95925e-05	0.000894644	St3gal6	ST3 beta-galactoside alpha-2,3-sialyltransferase 6
ENSRNOT00000073042	0.700372	1.23479	1.10774	1.9729	3.07299	2.62785	2.52	7.18961e-06	0.000110083	C3	complement component 3
ENSRNOT00000031656	3.05082	2.54782	3.12228	9.1148	6.57129	6.33235	2.52	0.000304079	0.00334465	Nhlrc1	NHL repeat containing E3 ubiquitin protein ligase 1
ENSRNOT00000081074	16.4107	13.6752	14.8492	38.1799	37.9918	36.5799	2.51	7.66862e-63	9.14766e-61	Zfp106	zinc finger protein 106
ENSRNOT00000009975	5.89221	3.22442	4.49806	12.3808	10.2448	11.4581	2.5	1.13365e-10	2.96678e-09	Usp2	ubiquitin specific peptidase 2
ENSRNOT00000003075	4.16542	3.86517	2.683	8.4789	7.41283	10.7433	2.49	0.000107239	0.00131176	Cxcl10	chemokine (C-X-C motif) ligand 10
ENSRNOT00000033627	48.5705	50.1407	48.3057	128.37	119.125	116.957	2.48	5.09551e-81	8.34145e-79	Nnt	nicotinamide nucleotide transhydrogenase
ENSRNOT00000015651	0.557575	0.689845	0.432299	1.42786	1.40856	1.33536	2.48	0.00534366	0.0404199	Spag5	sperm associated antigen 5
ENSRNOT00000016543	11.6796	13.5012	12.1557	29.8251	30.0843	32.871	2.48	2.36035e-36	1.80702e-34	Lpl	lipoprotein lipase
ENSRNOT00000038452	3.84374	5.12709	4.9172	10.8685	11.6905	11.6987	2.47	1.24479e-12	3.86966e-11	Pdpr	pyruvate dehydrogenase phosphatase regulatory subunit
ENSRNOT00000059807	2.62033	2.43145	3.45371	7.82865	7.83895	5.22963	2.46	4.38672e-05	0.00058444	RGD1309104	similar to RIKEN cDNA 1700025G04 gene
ENSRNOT00000080183	26.0678	27.1506	28.7077	71.978	66.6312	62.8557	2.46	1.39137e-29	8.66817e-28	Pla2g12a	phospholipase A2, group XIIA
ENSRNOT00000067905	1.03351	1.09602	1.51103	3.65492	2.82682	2.4752	2.46	0.00129788	0.0120749	Smpdl3b	sphingomyelin phosphodiesterase, acid-like 3B
ENSRNOT00000017071	7.21235	6.92324	7.86719	19.1066	18.0547	17.0746	2.46	4.89739e-10	1.21746e-08	Lgals9	lectin, galactoside-binding, soluble, 9
ENSRNOT00000004387	6.99294	7.13776	7.93746	17.1915	18.298	18.5341	2.45	2.39286e-16	9.2516e-15	Rcsd1	RCSD domain containing 1
ENSRNOT00000014217	8.17945	9.85899	10.199	22.8898	23.8136	22.1474	2.44	3.74797e-31	2.42327e-29	Cand2	cullin-associated and neddylation-dissociated 2 (putative)
ENSRNOT00000013460	0.896891	0.936271	0.938759	3.0624	1.69931	1.96901	2.43	0.00169209	0.0152447	Exoc3l4	exocyst complex component 3-like 4
ENSRNOT00000026652	9.56192	10.3515	13.7151	30.9484	25.7448	25.1267	2.43	2.7556e-09	6.3383e-08	Gdf15	growth differentiation factor 15
ENSRNOT00000078868	7.77118	6.61321	6.85556	18.8697	16.2858	16.1686	2.42	3.43238e-25	1.87296e-23	Acacb	acetyl-CoA carboxylase beta
ENSRNOT00000002329	1.46513	1.8127	1.47673	4.68998	2.62984	4.19121	2.42	0.00028281	0.00313311	Hrasls	HRAS-like suppressor
ENSRNOT00000028445	0.973484	0.526933	0.377381	1.59271	1.42377	1.48953	2.4	0.00216055	0.0187227	Slc4a1	solute carrier family 4 (anion exchanger), member 1
ENSRNOT00000018331	37.8493	43.0232	33.4536	95.3107	98.1321	80.0715	2.39	3.08264e-12	9.26478e-11	Tmem213	transmembrane protein 213
ENSRNOT00000000142	7.34192	8.14852	8.03624	19.2931	19.0642	17.5835	2.38	1.20871e-15	4.43906e-14	Dnajb5	DnaJ (Hsp40) homolog, subfamily B, member 5
ENSRNOT00000001570	2.11559	1.71771	1.10718	3.83754	4.11383	3.80005	2.38	0.000108035	0.0013194	Oasl	2'-5'-oligoadenylate synthetase-like
ENSRNOT00000036137	11.6239	10.9458	11.7759	26.3125	27.6816	27.4261	2.37	4.83906e-34	3.36939e-32	Pptc7	PTC7 protein phosphatase homolog (S. cerevisiae)
ENSRNOT00000023329	7.76633	5.49067	6.88158	15.7844	15.4891	16.5333	2.37	4.30684e-11	1.18135e-09	Me3	malic enzyme 3, NADP(+)-dependent, mitochondrial
ENSRNOT00000027616	12.5863	17.5185	18.9591	37.4754	38.8482	40.1912	2.37	1.618e-28	9.76384e-27	Bag3	Bcl2-associated athanogene 3
ENSRNOT00000021531	8.9755	7.46695	4.89521	18.4936	16.7896	14.8247	2.35	2.31388e-07	4.36882e-06	Endog	endonuclease G
ENSRNOT00000087662	45.0553	42.2773	40.1524	101.767	100.257	96.286	2.34	1.7231e-70	2.38875e-68	Gpd1	glycerol-3-phosphate dehydrogenase 1 (soluble)
ENSRNOT00000050760	2.17577	2.98033	3.08464	6.01401	6.36435	6.78237	2.33	5.25384e-08	1.06939e-06	Igf2	insulin-like growth factor 2
ENSRNOT00000066509	5.12603	4.67159	4.64143	11.7205	10.5154	11.4362	2.33	1.3029e-26	7.48097e-25	Spta1	spectrin, alpha, erythrocytic 1
ENSRNOT00000068148	0.684926	1.27111	0.955865	3.02076	1.73028	2.00488	2.32	0.00276996	0.0232665	Prg4	proteoglycan 4
ENSRNOT00000001958	125.617	139.568	134.044	324.038	293.603	309.423	2.32	2.92501e-70	4.01875e-68	Mdh2	malate dehydrogenase 2, NAD (mitochondrial)
ENSRNOT00000076519	10.994	7.65117	6.64864	19.7078	17.9797	21.0641	2.32	3.07986e-05	0.000424668	Cd36	CD36 molecule (thrombospondin receptor)
ENSRNOT00000035621	58.7276	56.9554	56.0492	141.983	131.181	123.106	2.31	2.81892e-35	2.0656e-33	Gbas	glioblastoma amplified sequence
ENSRNOT00000091911	1.55834	2.65102	2.05396	4.76663	3.93672	5.70188	2.3	3.2657e-05	0.000447883	LOC100910885	apolipoprotein L3-like
ENSRNOT00000024352	14.7115	17.017	20.0622	39.3941	40.5139	39.2552	2.3	2.34426e-21	1.13439e-19	Ubac1	UBA domain containing 1
ENSRNOT00000041328	3.0864	3.64499	3.65468	6.46673	10.5203	6.94377	2.3	0.000244559	0.00276103	LOC685186	similar to glyceraldehyde-3-phosphate dehydrogenase
ENSRNOT00000065501	2.2066	1.45034	1.4542	4.00262	3.88739	3.89011	2.3	5.73423e-06	8.94006e-05	Osbp2	oxysterol binding protein 2
ENSRNOT00000015138	1.98283	2.91318	1.22986	4.65457	5.66816	3.69348	2.29	0.000292185	0.00322767	Pde4d	phosphodiesterase 4D, cAMP-specific
ENSRNOT00000008614	5.50535	6.01382	7.19686	14.6932	12.5642	15.6885	2.29	2.42655e-16	9.35834e-15	Pvrl1	poliovirus receptor-related 1
ENSRNOT00000009342	7.72407	6.42071	6.88691	13.3241	17.9723	16.5718	2.28	9.01209e-12	2.60673e-10	Eepd1	endonuclease/exonuclease/phosphatase family domain containing 1
ENSRNOT00000021289	2.15779	3.56923	4.10243	8.00836	6.06229	8.3883	2.28	1.22919e-06	2.09698e-05	Sorbs1	sorbin and SH3 domain containing 1
ENSRNOT00000043907	2.39048	1.3309	2.07579	4.89732	3.81404	4.45284	2.27	0.000368376	0.00392832	Dennd1b	DENN/MADD domain containing 1B
ENSRNOT00000024471	15.0333	15.5289	14.9104	35.2294	35.1868	32.1546	2.26	1.07918e-24	5.78621e-23	LOC683884	similar to Acyl carrier protein, mitochondrial precursor (ACP) (NADH-ubiquinone oxidoreductase 9.6 kDa subunit) (CI-SDAP)
ENSRNOT00000010361	2.62885	5.40901	5.10436	9.85421	8.93582	10.8583	2.26	6.2168e-09	1.38243e-07	Fbxo32	F-box protein 32
ENSRNOT00000009462	2.5822	4.2787	2.40244	6.92751	6.03277	7.95117	2.26	3.51955e-05	0.000479706	Adhfe1	alcohol dehydrogenase, iron containing, 1
ENSRNOT00000024609	94.7732	92.9137	107.805	213.255	228.688	225.64	2.26	5.86161e-58	6.4891e-56	Uqcrfs1	ubiquinol-cytochrome c reductase, Rieske iron-sulfur polypeptide 1
ENSRNOT00000063990	0.448653	0.676509	0.365242	0.861699	1.29744	1.20881	2.26	0.00265647	0.022485	Kntc1	kinetochore associated 1
ENSRNOT00000076467	0.717947	0.333098	1.40273	1.89984	1.77551	1.83407	2.25	0.000749605	0.00743734	Pappa	pregnancy-associated plasma protein A
ENSRNOT00000072771	28.4723	30.2601	26.3362	65.424	62.3313	62.5072	2.24	3.5259e-36	2.65964e-34	Fem1a	fem-1 homolog a (C. elegans)
ENSRNOT00000064263	3.80232	4.21667	4.22788	9.73715	7.91623	9.77266	2.24	3.33692e-11	9.26869e-10	Limch1	LIM and calponin homology domains 1
ENSRNOT00000076452	6.26167	6.62866	6.97449	14.3789	15.9708	14.2219	2.24	6.11352e-18	2.54256e-16	Neurl1	neuralized E3 ubiquitin protein ligase 1
ENSRNOT00000081652	1.50008	3.09323	2.7913	5.26425	5.98349	5.18933	2.23	0.000154555	0.00183228	Ap1s2	adaptor-related protein complex 1, sigma 2 subunit
ENSRNOT00000023003	5.37131	3.51821	5.5853	11.058	10.3344	10.8461	2.23	9.7767e-05	0.00121228	Ybx2	Y box binding protein 2
ENSRNOT00000065335	1.2673	1.67993	1.60017	2.85901	3.6107	3.61323	2.22	5.17919e-05	0.000682925	Trim16	tripartite motif-containing 16
ENSRNOT00000017938	1.2374	1.64029	1.97358	3.24423	4.1601	3.38686	2.22	2.22901e-05	0.000316713	Pik3ap1	phosphoinositide-3-kinase adaptor protein 1
ENSRNOT00000014235	25.2094	24.4974	27.7021	59.813	56.6116	55.7797	2.22	3.08853e-50	3.04656e-48	Acsl1	acyl-CoA synthetase long-chain family member 1
ENSRNOT00000085876	3.05536	5.67025	6.55998	10.8337	12.3747	10.5071	2.21	5.72797e-06	8.93935e-05	Schip1	schwannomin interacting protein 1
ENSRNOT00000026364	14.3249	17.5122	17.9818	33.1902	39.3624	37.7563	2.21	6.57777e-17	2.61547e-15	Irf9	interferon regulatory factor 9
ENSRNOT00000077671	0.628794	1.33364	1.75506	3.22049	2.22148	2.72501	2.2	0.000411641	0.00433561	Kcnma1	potassium channel, calcium activated large conductance subfamily M alpha, member 1
ENSRNOT00000064251	2.61544	5.66281	5.04698	9.09571	9.96877	10.2851	2.2	1.13835e-09	2.73702e-08	Msrb3	methionine sulfoxide reductase B3
ENSRNOT00000015200	20.1771	14.1187	16.4643	39.5293	37.3384	34.988	2.2	4.89085e-21	2.32285e-19	Pex5l	peroxisomal biogenesis factor 5-like
ENSRNOT00000015956	59.3261	65.3447	59.7837	133.115	135.099	136.301	2.19	1.51994e-67	1.99904e-65	Got2	glutamic-oxaloacetic transaminase 2, mitochondrial
ENSRNOT00000021812	27.0988	25.1455	28.2307	59.6218	52.8277	62.9197	2.18	6.81825e-26	3.7877e-24	Ces1d	carboxylesterase 1D
ENSRNOT00000015852	44.7949	38.159	40.8566	93.4001	85.4135	91.3358	2.18	5.10306e-51	5.09908e-49	Ndufs1	NADH dehydrogenase (ubiquinone) Fe-S protein 1
ENSRNOT00000054937	7.55009	8.5831	7.50259	17.5462	16.9341	16.8513	2.17	7.52018e-38	5.96498e-36	Tacc2	transforming, acidic coiled-coil containing protein 2
ENSRNOT00000078663	34.978	36.8165	41.7715	79.3235	84.5446	82.9368	2.17	5.37882e-16	2.01385e-14	Nr4a1	nuclear receptor subfamily 4, group A, member 1
ENSRNOT00000080675	0.942027	1.74825	1.62769	2.75701	2.5766	3.97504	2.16	0.00220461	0.0190695	Itgb8	integrin, beta 8
ENSRNOT00000016157	1.02065	2.01255	1.5431	3.04936	2.9516	3.87032	2.16	0.00117705	0.0110847	Ncaph	non-SMC condensin I complex, subunit H
ENSRNOT00000041493	61.6712	64.0797	65.4092	142.738	134.462	135.693	2.16	5.47193e-97	1.07951e-94	Kif1c	kinesin family member 1C
ENSRNOT00000024237	20.1118	18.6621	15.801	35.8615	47.0633	34.9654	2.16	2.05988e-08	4.35405e-07	Nudt8	nudix (nucleoside diphosphate linked moiety X)-type motif 8
ENSRNOT00000067453	0.511549	0.37974	0.380749	0.873332	1.10185	0.775917	2.16	0.00642132	0.047053	Pole	polymerase (DNA directed), epsilon, catalytic subunit
ENSRNOT00000091755	0.689039	1.27874	1.28214	2.45072	2.93165	1.65021	2.16	0.00412342	0.0325848	Kif23	kinesin family member 23
ENSRNOT00000024941	13.375	12.4109	12.3218	27.3114	28.4532	26.2749	2.15	4.04857e-20	1.82696e-18	Ppp1r3c	protein phosphatase 1, regulatory subunit 3C
ENSRNOT00000002028	2.89839	2.68947	2.81919	5.2856	6.51623	6.31045	2.15	1.08966e-05	0.000162478	Ncf1	neutrophil cytosolic factor 1
ENSRNOT00000004477	1.01169	1.44426	1.23088	2.72365	2.35917	2.79571	2.14	0.00021971	0.00251182	Grin2c	glutamate receptor, ionotropic, N-methyl D-aspartate 2C
ENSRNOT00000005719	13.9285	12.9245	11.832	30.4994	25.6049	26.5898	2.14	1.51944e-05	0.000221622	Mgst3	microsomal glutathione S-transferase 3
ENSRNOT00000086576	3.34279	3.17397	3.47171	7.29953	6.69783	7.38519	2.14	8.1203e-10	1.99291e-08	Itgb6	integrin, beta 6
ENSRNOT00000004237	15.5664	11.4034	15.6261	31.1213	30.3919	29.7592	2.14	2.7529e-08	5.70912e-07	Pla2g10	phospholipase A2, group X
ENSRNOT00000076823	295.908	264.839	287.983	614.418	593.453	597.434	2.13	1.20298e-129	3.08525e-127	Aco2	aconitase 2, mitochondrial
ENSRNOT00000015332	116.023	119.109	113.942	248.697	251.522	242.877	2.13	3.19049e-86	5.77591e-84	Pkm	pyruvate kinase, muscle
ENSRNOT00000029990	3.96537	7.16541	4.85436	11.4018	9.98968	12.6625	2.13	2.79605e-06	4.57233e-05	Ifi44	interferon-induced protein 44
ENSRNOT00000050696	9.85842	9.25234	10.9541	20.1005	21.8861	22.1713	2.13	5.43087e-33	3.6978e-31	Wnk2	WNK lysine deficient protein kinase 2
ENSRNOT00000063882	9.06429	8.33841	8.72407	19.4102	18.0154	18.3399	2.13	4.11627e-22	2.05653e-20	Slc41a1	solute carrier family 41 (magnesium transporter), member 1
ENSRNOT00000079646	57.9596	49.4619	56.0903	116.237	113.273	116.511	2.12	1.75862e-40	1.47074e-38	Ccng1	cyclin G1
ENSRNOT00000089068	4.58559	7.37541	8.20765	11.6684	16.1308	14.9568	2.12	7.20647e-07	1.2659e-05	Ppp1r12b	Protein Ppp1r12b; Protein phosphatase 1, regulatory (Inhibitor) subunit 12B (Predicted)
ENSRNOT00000046313	4.76649	4.87654	5.57175	10.7457	11.2125	10.3422	2.12	2.42034e-09	5.63451e-08	Arntl	aryl hydrocarbon receptor nuclear translocator-like
ENSRNOT00000004797	73.0219	79.4006	71.2069	157.438	157.345	156.053	2.11	4.31312e-48	4.09693e-46	Tuba4a	tubulin, alpha 4A
ENSRNOT00000014058	23.9207	27.5349	29.0166	56.3464	55.5579	57.5306	2.11	2.16636e-17	8.88957e-16	Cycs	cytochrome c, somatic
ENSRNOT00000025716	10.4894	11.2906	10.5399	27.9362	22.4262	17.7526	2.11	4.13677e-05	0.000555467	Znrf1	zinc and ring finger 1, E3 ubiquitin protein ligase
ENSRNOT00000091731	23.7831	17.5733	15.5711	40.6032	37.2435	42.5437	2.11	1.11907e-09	2.69488e-08	Cdkn1a	cyclin-dependent kinase inhibitor 1A
ENSRNOT00000023838	14.0939	10.749	12.9331	27.3577	26.4916	25.4313	2.1	2.21711e-13	7.19696e-12	Mief2	mitochondrial elongation factor 2
ENSRNOT00000017965	83.517	95.613	85.019	191.653	182.357	180.969	2.1	4.41864e-51	4.44405e-49	Ldhb	lactate dehydrogenase B
ENSRNOT00000039263	4.70092	5.38843	7.71821	12.0383	13.6771	11.6999	2.1	2.49594e-05	0.000350433	Isg15	ISG15 ubiquitin-like modifier
ENSRNOT00000015102	21.7126	19.1881	23.774	48.0375	44.5406	42.4493	2.09	4.16274e-26	2.32088e-24	Idh3a	isocitrate dehydrogenase 3 (NAD+) alpha
ENSRNOT00000039728	90.3753	84.8919	86.8405	184.011	182.312	180.961	2.09	3.83005e-39	3.13494e-37	Ndufs7	NADH dehydrogenase (ubiquinone) Fe-S protein 7
ENSRNOT00000043146	2.19833	2.9141	2.62966	4.82536	6.51387	4.76347	2.08	0.000278794	0.00309306	Trim45	tripartite motif-containing 45
ENSRNOT00000015553	0.929292	1.72461	1.35865	3.05971	2.85949	2.43757	2.08	0.00517713	0.0393209	Dlgap5	discs, large (Drosophila) homolog-associated protein 5
ENSRNOT00000015767	2.37338	1.67794	1.2618	3.85896	3.69659	3.51874	2.08	0.00032846	0.00355689	Pnpla3	patatin-like phospholipase domain containing 3
ENSRNOT00000034843	1.69461	2.75181	3.15328	5.66564	5.06958	4.9604	2.07	0.000200283	0.00231552	Tsku	tsukushi, small leucine rich proteoglycan
ENSRNOT00000009815	45.3382	40.8681	37.3611	86.8016	85.7717	82.7295	2.07	1.51184e-12	4.66215e-11	Atp5g1	ATP synthase, H+ transporting, mitochondrial Fo complex, subunit C1 (subunit 9)
ENSRNOT00000086716	0.74534	1.03742	0.44579	1.59058	1.40156	1.61504	2.07	0.000937847	0.00906507	Cit	citron rho-interacting serine/threonine kinase
ENSRNOT00000000497	7.19727	6.67847	6.69622	13.0321	13.7452	15.8442	2.07	4.72571e-07	8.62625e-06	Ppt2	palmitoyl-protein thioesterase 2
ENSRNOT00000060499	11.2226	12.9794	13.7705	26.518	27.3778	24.8001	2.07	7.01131e-15	2.48023e-13	E2f6	E2F transcription factor 6
ENSRNOT00000013341	1.55791	2.22402	1.7282	2.96661	4.78013	3.58761	2.06	0.000179074	0.00209265	Adamts15	ADAM metallopeptidase with thrombospondin type 1 motif, 15
ENSRNOT00000001556	19.3295	23.6605	22.3841	47.3934	43.6359	43.5024	2.06	5.8992e-19	2.5571e-17	Acads	acyl-CoA dehydrogenase, C-2 to C-3 short chain
ENSRNOT00000008184	1.79191	2.84276	2.85031	3.55262	6.22527	5.62975	2.06	0.000984081	0.00945849	Adam19	ADAM metallopeptidase domain 19
ENSRNOT00000055683	12.3083	12.6688	16.7441	27.5466	28.7969	29.23	2.05	3.98046e-23	2.02819e-21	Akap1	A kinase (PRKA) anchor protein 1
ENSRNOT00000004917	35.4882	35.4795	35.9998	72.5083	74.3389	72.7461	2.05	2.25993e-26	1.28799e-24	Fh	fumarate hydratase
ENSRNOT00000058423	101.974	96.7216	99.9237	204.974	198.957	204.331	2.04	3.65911e-59	4.20197e-57	Ndufs2	NADH dehydrogenase (ubiquinone) Fe-S protein 2
ENSRNOT00000052003	3.40644	3.4243	3.16929	9.12721	5.66147	5.5899	2.04	0.00249836	0.0213345	Cmpk2	cytidine monophosphate (UMP-CMP) kinase 2, mitochondrial
ENSRNOT00000018923	2.27197	2.25879	1.35887	3.87878	5.04905	3.10929	2.04	0.00238744	0.0204896	Cdt1	chromatin licensing and DNA replication factor 1
ENSRNOT00000058626	1.61985	2.34858	1.78966	3.88893	4.03827	3.63699	2.01	0.000230881	0.00261428	Herc6	HECT and RLD domain containing E3 ubiquitin protein ligase family member 6
ENSRNOT00000021168	6.19238	10.3799	9.47825	18.0744	15.1387	19.136	2.01	5.54867e-08	1.12494e-06	Efhd1	EF-hand domain family, member D1
ENSRNOT00000007523	16.8543	17.0612	16.4956	32.3243	34.7491	34.2493	2.01	1.28069e-13	4.21997e-12	Lmcd1	LIM and cysteine-rich domains 1
ENSRNOT00000024000	8.2393	9.17447	11.4986	18.427	20.1132	19.6011	2.01	9.28018e-11	2.45789e-09	Aldh1a1	aldehyde dehydrogenase 1 family, member A1
ENSRNOT00000084171	1.82865	2.6301	1.95655	4.3707	4.15763	4.37952	2.01	3.96926e-05	0.000535781	Cyp1b1	cytochrome P450, family 1, subfamily b, polypeptide 1
ENSRNOT00000010610	5.25511	7.66277	7.91595	16.2345	11.978	13.3848	2	1.13776e-05	0.000169485	Ankrd9	ankyrin repeat domain 9
ENSRNOT00000005463	1.50574	2.0958	0.963127	3.2133	3.15318	2.77975	2	0.000696881	0.00696791	Nedd1	neural precursor cell expressed, developmentally down-regulated 1
Down-regualted genes in LP comapred to NP (57 genes):
ID	NP-1	NP-2	NP-3	LP-1	LP-2	LP-3	fold(LP/NP)	pvalue	adjusted-pvalue	Symbol	Title
ENSRNOT00000030203	16.0056	16.1647	16.8659	1.35871	1.76361	1.76485	-10.03	6.23058e-68	8.26519e-66	Slc2a10	solute carrier family 2 (facilitated glucose transporter), member 10
ENSRNOT00000004762	23.1389	20.9678	17.9961	1.85172	3.60531	1.87608	-8.47	2.85581e-32	1.88606e-30	Fmo2	flavin containing monooxygenase 2
ENSRNOT00000015720	2.11354	2.28806	1.63867	0.300692	0.421523	0.562424	-4.7	0.000999926	0.00959879	Stmn2	stathmin 2
ENSRNOT00000004578	0.870307	2.01893	1.48448	0.247636	0.231431	0.463186	-4.64	0.00207286	0.0181131	Cacng5	calcium channel, voltage-dependent, gamma subunit 5
ENSRNOT00000004864	3.30844	3.20344	3.47961	0.982308	0.68852	0.574169	-4.45	2.64781e-06	4.34839e-05	Fmo3	flavin containing monooxygenase 3
ENSRNOT00000091751	164.963	137.362	142.574	37.7977	34.2854	28.4179	-4.43	9.34632e-35	6.5973e-33	Snx22	sorting nexin 22
ENSRNOT00000002838	14.4895	16.3754	15.0363	3.32998	4.29762	3.55915	-4.1	1.40165e-17	5.76701e-16	Eva1c	eva-1 homolog C
ENSRNOT00000033940	0.93407	1.19177	1.19493	0.099667	0.465725	0.279631	-3.93	0.00670365	0.0488658	Bhlhe22	basic helix-loop-helix family, member e22
ENSRNOT00000060492	3.50051	3.89782	3.5825	0.298809	1.67553	0.838354	-3.9	0.00447337	0.0347833	Ccdc152	coiled-coil domain containing 152
ENSRNOT00000020505	1.5173	1.92664	2.00606	0.477175	0.382242	0.573766	-3.8	1.81251e-05	0.000262133	Cyp26b1	cytochrome P450, family 26, subfamily b, polypeptide 1
ENSRNOT00000071545	61.2769	55.9715	60.1288	17.1632	16.8039	12.9939	-3.78	2.27883e-23	1.16889e-21	Mro	maestro
ENSRNOT00000045356	23.2546	20.1655	22.022	3.8992	6.29426	7.1827	-3.77	1.02975e-28	6.23847e-27	Zbtb16	zinc finger and BTB domain containing 16
ENSRNOT00000026186	54.9635	57.618	54.1777	15.4701	13.9838	16.8397	-3.6	2.65997e-32	1.76429e-30	Sult1a1	sulfotransferase family, cytosolic, 1A, phenol-preferring, member 1
ENSRNOT00000022282	8.56585	7.9484	7.90141	1.99985	2.21941	2.86388	-3.45	4.59096e-19	2.00698e-17	Vwa5b1	von Willebrand factor A domain containing 5B1
ENSRNOT00000006357	377.432	353.995	359.974	114.636	102.814	115.855	-3.27	6.56411e-131	1.71201e-128	Creld2	cysteine-rich with EGF-like domains 2
ENSRNOT00000018637	2.37641	1.87435	1.98988	0.608562	0.568739	0.75885	-3.22	0.000822075	0.00805225	Nefm	neurofilament, medium polypeptide
ENSRNOT00000085579	41.1457	38.7413	36.5924	11.3632	12.7918	12.3177	-3.19	8.37629e-20	3.74693e-18	Kcnmb4	potassium channel subfamily M regulatory beta subunit 4
ENSRNOT00000017761	2.19549	2.22822	2.17031	0.644222	0.602065	0.821574	-3.19	5.07857e-06	8.01529e-05	Hecw2	HECT, C2 and WW domain containing E3 ubiquitin protein ligase 2
ENSRNOT00000014455	7.3696	6.83838	6.55844	2.1881	3.32299	1.27897	-3.06	0.00030844	0.00338536	Gpr27	G protein-coupled receptor 27
ENSRNOT00000085158	58.0721	53.6869	54.9281	17.4095	18.4967	18.8524	-3.04	2.59546e-63	3.12023e-61	Aldh1a3	aldehyde dehydrogenase 1 family, member A3
ENSRNOT00000087037	14.6539	14.6211	10.2619	3.76608	5.27945	4.15105	-3	2.08139e-08	4.39348e-07	Gdf10	growth differentiation factor 10
ENSRNOT00000065618	6.80224	6.13659	7.03188	1.12904	2.26105	3.31854	-2.98	6.18195e-06	9.56058e-05	Galnt15	polypeptide N-acetylgalactosaminyltransferase 15
ENSRNOT00000081908	5.53085	5.13218	5.36955	1.23162	1.15103	3.07156	-2.94	0.000400008	0.00423046	Ighm	immunoglobulin heavy constant mu
ENSRNOT00000033119	16.7355	18.3164	14.8717	6.13551	6.07634	5.13854	-2.88	1.69277e-20	7.82232e-19	Fkbp5	FK506 binding protein 5
ENSRNOT00000026262	4.19745	5.08029	5.60317	1.24626	1.74706	2.18536	-2.87	0.000102796	0.00126546	Chst5	carbohydrate (N-acetylglucosamine 6-O) sulfotransferase 5
ENSRNOT00000027506	16.9644	15.9165	14.9066	4.55886	6.2655	5.86862	-2.86	4.70411e-31	3.02874e-29	Per2	period circadian clock 2
ENSRNOT00000005829	4.01601	3.54907	5.33775	1.4692	1.83074	1.22135	-2.85	0.000450692	0.00470505	Avpr1a	arginine vasopressin receptor 1A
ENSRNOT00000002640	2.0914	2.65562	2.66268	0.751684	0.526871	1.3181	-2.85	0.000453266	0.00472872	Cldn1	claudin 1
ENSRNOT00000058453	30.4014	25.6454	24.201	11.1021	8.17075	9.21476	-2.82	2.48392e-14	8.5509e-13	Cd200	Cd200 molecule
ENSRNOT00000004305	316.376	288.411	291.14	109.989	102.027	108.528	-2.8	1.57552e-64	1.93953e-62	Mid1ip1	MID1 interacting protein 1
ENSRNOT00000037251	56.1067	58.1874	59.4935	18.1362	23.5316	22.7248	-2.7	3.72814e-56	4.01179e-54	Bhlha15	basic helix-loop-helix family, member a15
ENSRNOT00000012075	14.8592	14.219	10.5846	5.15288	3.88959	5.7458	-2.68	9.38207e-08	1.83912e-06	Ass1	argininosuccinate synthase 1
ENSRNOT00000089184	6.79994	10.562	7.56435	3.40701	2.9482	3.06828	-2.65	4.42571e-06	7.05729e-05	Clcnka	Chloride channel protein
ENSRNOT00000003280	38.1284	36.6142	35.9782	14.9279	14.4619	13.4889	-2.58	8.44799e-66	1.06555e-63	Tfcp2l1	transcription factor CP2-like 1
ENSRNOT00000007790	59.589	51.1898	64.5363	21.6578	22.8403	24.157	-2.55	7.28246e-19	3.14782e-17	Pgf	placental growth factor
ENSRNOT00000079760	3.61684	3.48521	4.40044	1.42495	1.66463	1.44369	-2.54	0.000425095	0.00446205	Sdr42e1	short chain dehydrogenase/reductase family 42E, member 1
ENSRNOT00000072483	7.74958	8.81912	7.07404	3.36999	3.38275	2.68476	-2.51	9.1534e-07	1.58519e-05	Sult1d1	sulfotransferase family 1D, member 1
ENSRNOT00000024932	16.5788	16.8007	17.7925	7.69668	6.43891	6.44343	-2.49	1.89892e-23	9.77277e-22	Per3	period circadian clock 3
ENSRNOT00000001201	59.0475	55.574	59.94	24.2118	22.0386	24.1585	-2.48	7.39923e-48	6.859e-46	Hsph1	heat shock 105/110 protein 1
ENSRNOT00000007802	7.26187	5.77579	7.23892	2.21387	3.7242	2.2775	-2.47	0.000930887	0.00901719	Car8	carbonic anhydrase 8
ENSRNOT00000068216	88.1846	78.4185	72.9293	28.9254	32.895	38.1328	-2.4	1.4963e-15	5.44328e-14	Rgcc	regulator of cell cycle
ENSRNOT00000023180	3.07059	3.799	2.09501	1.13581	1.22479	1.38907	-2.39	0.000793269	0.00781377	Zfp366	zinc finger protein 366
ENSRNOT00000025590	5.74338	6.42661	8.01531	3.0281	1.75187	3.91076	-2.32	8.71125e-05	0.00109696	Ghdc	GH3 domain containing
ENSRNOT00000025294	650.205	619.475	630.086	282.678	272.899	269.056	-2.3	4.15836e-133	1.10326e-130	Slc20a1	solute carrier family 20 (phosphate transporter), member 1
ENSRNOT00000018427	47.1161	47.4249	49.0369	17.7236	27.394	17.213	-2.3	2.1787e-06	3.62049e-05	Defb1	defensin beta 1
ENSRNOT00000036383	26.2012	24.7317	26.1984	10.7972	10.8115	11.9009	-2.3	2.59686e-15	9.33655e-14	Tdrp	testis development related protein
ENSRNOT00000026426	43.7903	40.6338	39.1519	17.8695	18.7451	18.4172	-2.25	3.77448e-16	1.43058e-14	Smim3	small integral membrane protein 3
ENSRNOT00000067638	11.7909	12.7273	11.4178	4.72435	6.14288	5.18669	-2.24	2.83954e-05	0.000394358	Fam105a	family with sequence similarity 105, member A
ENSRNOT00000082657	16.9001	15.9195	18.5825	7.65027	7.25178	8.07455	-2.24	8.1531e-12	2.37613e-10	Mboat2	Membrane-bound O-acyltransferase domain-containing protein 2
ENSRNOT00000027055	14.667	13.6097	11.3287	4.96073	6.18148	6.62766	-2.23	5.03353e-05	0.0006669	Fam132a	family with sequence similarity 132, member A
ENSRNOT00000044613	254.409	242.546	250.766	111.662	112.891	111.175	-2.23	3.11205e-122	7.48254e-120	Hyou1	hypoxia up-regulated 1
ENSRNOT00000027022	20.5908	19.3396	15.8866	10.2888	8.21323	7.01622	-2.19	5.82721e-07	1.04266e-05	Doc2a	double C2-like domains, alpha
ENSRNOT00000073026	120.117	109.432	106.929	55.2282	57.0587	44.8944	-2.14	3.74347e-20	1.69425e-18	Gtf3a	general transcription factor III A
ENSRNOT00000011509	32.3418	30.5324	30.0903	15.1241	14.5831	14.1443	-2.12	5.25576e-09	1.18412e-07	Csf3	colony stimulating factor 3 (granulocyte)
ENSRNOT00000011663	103.441	97.7504	92.4791	46.484	46.098	46.1303	-2.12	5.2415e-27	3.05516e-25	Pdlim2	PDZ and LIM domain 2
ENSRNOT00000001682	19.3834	20.9839	20.2487	10.4501	8.95238	9.36587	-2.11	1.52781e-09	3.62807e-08	Lfng	LFNG O-fucosylpeptide 3-beta-N-acetylglucosaminyltransferase
ENSRNOT00000008728	470.846	442.118	447.502	222.668	207.475	216.712	-2.1	4.26182e-68	5.75271e-66	Pdia4	protein disulfide isomerase family A, member 4

## Sheet: Table S2
Table S2. Predicted target genes for MAZ and TFCP2 and subsequent gene ontology analysis.
(A) Predicted target genes for MAZ (green, down-regualted genes in LP compared to NP; green, up-regualted genes in LP compared to NP)
Cyp26b1	Nedd1	Limch1	Gstm7	Ppara	Slfn3	Slc38a4	Asb10	Lsmem1	Ldb3
Zbtb16	Herc6	Pappa	Car3	Smarcd3	Pla2g5	Hspb2	Usp13	Scn1b	Klhl31
Sult1a1	Lmcd1	Kntc1	Megf11	Ppargc1b	Prkaa2	Ube2c	Pla2g7	Adck3	Tbx15
Hecw2	Cmpk2	Fbxo32	Tcea3	Car14	Fam83d	Adamts8	Cacng6	Crhr2	Myom3
Gpr27	Adam19	Adhfe1	Ube2d1	Adam11	Phka1	Scn1a	Egln3	Sbk2	Lmod3
Aldh1a3	Adamts15	Dennd1b	Afap1l1	Ifi27l2b	Sh2b2	Asf1b	Kbtbd12	Alpk3	Smyd1
Gdf10	Trim45	Pvrl1	Agl	Rcan2	Nog	Tmem233	Pde4dip	Agbl1	Art1
Galnt15	Idh3a	Osbp2	Hspb8	Lrrc3	Cdk1	Rbm24	Lgi2	Synpo2l	Txlnb
Chst5	Ldhb	Gbas	Tacc3	Cdc20	Slc25a12	Cacna2d1	Shox2	Trim55	Hfe2
Cd200	Cdkn1a	Igf2	Gpr157	Gja3	Tmprss3	Mn1	Sh3rf2	Kcnc4
Per2	Tuba4a	Pptc7	Ak1	Dusp23	Fgf7	Adcy2	Thbs4	Prr33
Mid1ip1	Znrf1	Bag3	Popdc2	Tmem119	Grb14	Hspa1l	Apod	Lrrc2
Bhlha15	Ccng1	Oasl	Sgcb	Pitx3	Bin1	Relt	Mpz	LOC298139
Clcnka	Ppp1r12b	Tmem213	Mx2	Synpo	Fam78a	Cacng4	Slc2a4	Myoz1
Pgf	Wnk2	Slc4a1	Irf7	Bub1b	Bpifa1	Foxg1	Plin4	Fndc5
Hsph1	Pla2g10	Acacb	Ndrg2	Cacna2d3	Slc16a1	Rtn2	Asb2	Plin5
Zfp366	Grin2c	Hrasls	Frzb	Barx2	Csap1	Ip6k3	Tceal7	Dusp26
Hyou1	Itgb6	Exoc3l4	Ifi27	P2rx5	Sema6c	Nkain1	Atp1a2	Nmrk2
Mboat2	Ncf1	Gdf15	St8sia5	Cacnb1	Melk	Spata20	Klhl38	Klhl33
Smim3	Itgb8	Cand2	Oasl2	Vldlr	Prr32	Lrrc20	Pla2g2a	Myoz3
Doc2a	Pole	Rcsd1	Homer2	Acsl6	Synpo2	Jph2	Akap6	Fbxo40
Pdlim2	Irf9	RGD1309104	C6	Ccnb1	Padi2	Gpc1	Myadml2	Actn3
	Pik3ap1	Lgals9	Scgb1a1	Crat	Art3	Kcnq4	Cyp1a1	Apobec2
	Trim16	Lpl	Alpk2	Prc1	Cep55	Atp1b4	Nos1	Dusp27
	Ybx2	Cxcl10	Nrep	Hsf4	Vstm2b	Adamts20	Tuba8	Jsrp1
(B) Predicted target genes for TFCP2 (green, down-regualted genes in LP compared to NP; green, up-regualted genes in LP compared to NP)
Slc2a10	Aldh1a1	Trim16	Hspb8	Ramp1	Kif22	Sh3rf2	Agbl1	Art1
Fmo2	Herc6	Neurl1	Popdc2	Espl1	Acox2	Thbs4	Asb5	Obscn
Mro	Ndufs2	Pappa	Igdcc4	Extl1	Rbm38	Apod	Ankrd1	Nrap
Zbtb16	Cmpk2	Eepd1	Ppm1j	Phka1	Tmem233	Fbp2	Mafa	Cox6a2
Nefm	Cdt1	Sorbs1	Mx2	Iqgap3	Ankle1	Adamtsl5	Prr33	Atp2a1
Aldh1a3	Akap1	Pvrl1	Prima1	Fxyd6	Rbm24	Pkia	Tmem182	Hfe2
Gdf10	Acads	LOC685186	Filip1	Ccna2	Arx	Ppp1r27	Mlip
Galnt15	Adamts15	Spta1	Wipf3	Slc25a12	Cacna2d1	Slc2a4	Mybpc1
Chst5	E2f6	Igf2	Homer2	Fgf7	Relt	Asb2	Plin5
Mid1ip1	Trim45	Gpd1	Tmem65	Ptp4a3	Ip6k3	Atp1a2	Fitm1
Bhlha15	Dlgap5	Gdf15	Ppargc1b	Top2a	Jph2	Ddit4l2	Asb16
Clcnka	Idh3a	Rcsd1	Car14	Csap1	Trim7	Camk2a	Dhrs7c
Pgf	Cdkn1a	Smpdl3b	Adam11	Sema6c	Gpc1	Pgam2	Apobec2
Hsph1	Tuba4a	Pla2g12a	Dnajc28	Prr32	Pfkm	Lrrc39	Ldb3
Car8	Slc41a1	Nnt	Kif11	Synpo2	Adamts20	Klhl38	Sln
Zfp366	Aco2	Gypc	Pitx3	Art3	Cdh15	Arpp21	Ampd1
Defb1	Grin2c	Nhlrc1	Bub1b	Hhatl	Scgb3a1	Pla2g2a	Cox8b
Fam105a	Ppp1r3c	Slc8a3	Dusp10	Hspb2	Usp13	Neu2	Klhl40
Doc2a	Ncaph	Cd55	Prob1	Spsb4	Got1	A930018M24Rik	Tbx15
Pdlim2	Itgb8	Megf11	Barx2	Sh3bgr	Chac1	Scn4b	Rbfox1
Lfng	Tacc2	Macrod1	Cacnb1	Nol3	Egln3	Akap6	Ankrd23
	Ces1d	Tcea3	Vldlr	Ppp1r1a	Pde4dip	Nos1	Myom3
	Got2	Ube2d1	Acsl6	Pdlim3	Prkag3	Lsmem1	Lmod3
	Pex5l	Coro6	Nexn	Uhrf1	Hspb6	Alpk3	Myo18b
	Acsl1	Dtna	Plcd4	Adamts8	Mybl2	Popdc3	Tnni2
(C) Gene ontology analysis of MAZ target genes (pvalue < 0.01 and count >= 10)
ID	Term	Count	pvalue	Genes
GO:0000278	mitotic cell cycle	14	0.000172703	CDK1, PRC1, POLE, KNTC1, CDC20, CEP55, UBE2C, CCNG1, CCNB1, FAM83D, NEDD1, CDKN1A, BUB1B, UBE2D1
GO:0022403	cell cycle phase	14	0.00050933	FAM83D, CCNB1, CDK1, CDKN1A, NEDD1, PRC1, POLE, KNTC1, BUB1B, CDC20, CEP55, CCNG1, UBE2C, TACC3
GO:0007067	mitosis	10	0.000605609	CCNB1, FAM83D, CDK1, NEDD1, KNTC1, BUB1B, CDC20, CEP55, CCNG1, UBE2C
GO:0000280	nuclear division	10	0.000605609	CCNB1, FAM83D, CDK1, NEDD1, KNTC1, BUB1B, CDC20, CEP55, CCNG1, UBE2C
GO:0000087	M phase of mitotic cell cycle	10	0.000689079	CCNB1, FAM83D, CDK1, NEDD1, KNTC1, BUB1B, CDC20, CEP55, CCNG1, UBE2C
GO:0048285	organelle fission	10	0.000806414	CCNB1, FAM83D, CDK1, NEDD1, KNTC1, BUB1B, CDC20, CEP55, CCNG1, UBE2C
GO:0006508	proteolysis	24	0.000815259	CDK1, ADAM11, AGBL1, FBXO40, ADAMTS20, C6, ADAMTS15, HERC6, CDC20, ZNRF1, UBE2C, TMPRSS3, CCNB1, ADAMTS8, PAPPA, ASB10, BUB1B, CAND2, SH3RF2, FBXO32, ASB2, ADAM19, UBE2D1, USP13
GO:0000279	M phase	12	0.00083116	CCNB1, FAM83D, CDK1, NEDD1, PRC1, KNTC1, BUB1B, CDC20, CEP55, CCNG1, UBE2C, TACC3
GO:0022402	cell cycle process	16	0.00108089	CDK1, PRC1, AK1, POLE, KNTC1, CDC20, CEP55, TACC3, UBE2C, CCNG1, CCNB1, FAM83D, NEDD1, CDKN1A, BUB1B, UBE2D1
GO:0051301	cell division	11	0.00129127	CCNB1, FAM83D, CDK1, NEDD1, PRC1, KNTC1, BUB1B, CDC20, CEP55, CCNG1, UBE2C
GO:0051603	proteolysis involved in cellular protein catabolic process	16	0.00195418	CDK1, FBXO40, HERC6, CDC20, UBE2C, ZNRF1, CCNB1, ASB10, BUB1B, SH3RF2, CAND2, FBXO32, ADAM19, ASB2, UBE2D1, USP13
GO:0044257	cellular protein catabolic process	16	0.00205075	CDK1, FBXO40, HERC6, CDC20, UBE2C, ZNRF1, CCNB1, ASB10, BUB1B, SH3RF2, CAND2, FBXO32, ADAM19, ASB2, UBE2D1, USP13
GO:0030163	protein catabolic process	16	0.00275951	CDK1, FBXO40, HERC6, CDC20, UBE2C, ZNRF1, CCNB1, ASB10, BUB1B, SH3RF2, CAND2, FBXO32, ADAM19, ASB2, UBE2D1, USP13
GO:0051726	regulation of cell cycle	11	0.00300014	CCNB1, CDK1, CDKN1A, CYP1A1, FOXG1, KNTC1, BUB1B, IGF2, CCNG1, UBE2C, TACC3
GO:0043632	modification-dependent macromolecule catabolic process	15	0.00344636	CDK1, FBXO40, HERC6, CDC20, UBE2C, ZNRF1, CCNB1, ASB10, BUB1B, SH3RF2, CAND2, FBXO32, ASB2, UBE2D1, USP13
GO:0019941	modification-dependent protein catabolic process	15	0.00344636	CDK1, FBXO40, HERC6, CDC20, UBE2C, ZNRF1, CCNB1, ASB10, BUB1B, SH3RF2, CAND2, FBXO32, ASB2, UBE2D1, USP13
GO:0006811	ion transport	18	0.00352985	SLC38A4, SCN1A, KCNC4, CACNA2D1, JPH2, SCN1B, CACNG6, ATP1B4, CACNB1, CACNG4, ATP1A2, CACNA2D3, SLC25A12, P2RX5, KCNQ4, SLC16A1, GRIN2C, SLC4A1
GO:0030001	metal ion transport	13	0.0042876	SLC38A4, KCNC4, CACNA2D1, SCN1A, JPH2, SCN1B, ATP1B4, CACNG6, CACNB1, CACNG4, ATP1A2, CACNA2D3, KCNQ4
GO:0044265	cellular macromolecule catabolic process	16	0.00997671	CDK1, FBXO40, HERC6, CDC20, UBE2C, ZNRF1, CCNB1, ASB10, BUB1B, SH3RF2, CAND2, FBXO32, ADAM19, ASB2, UBE2D1, USP13
(D) Gene ontology analysis of TFCP2 target genes (pvalue < 0.01 and count >= 10)
ID	Term	Count	pvalue	Genes
GO:0015980	energy derivation by oxidation of organic compounds	10	8.89189e-06	SLC25A12, PRKAG3, PPP1R3C, NNT, GOT1, ACO2, PPP1R1A, PHKA1, NDUFS2, IDH3A
GO:0006091	generation of precursor metabolites and energy	13	4.11426e-05	SLC25A12, PRKAG3, PPP1R3C, NNT, GOT1, ACO2, PPP1R1A, PHKA1, COX6A2, PGAM2, PFKM, NDUFS2, IDH3A
GO:0000278	mitotic cell cycle	11	0.00269475	KIF22, NCAPH, CDKN1A, KIF11, E2F6, DLGAP5, BUB1B, ESPL1, UBE2D1, CAMK2A, CCNA2
GO:0022403	cell cycle phase	11	0.00593139	KIF22, NCAPH, CDKN1A, KIF11, E2F6, DLGAP5, BUB1B, ESPL1, CAMK2A, CCNA2, TACC2
GO:0007049	cell cycle	15	0.00998666	KIF22, KIF11, E2F6, DLGAP5, ESPL1, CDT1, TACC2, NCAPH, CDKN1A, UHRF1, BUB1B, RBM38, UBE2D1, CAMK2A, CCNA2

## Sheet: Table S3
Table S3. Primers used in this study for quantitative RT-PCR analysis.
Symbol	ID	Primers	Length
Atp1a2	ENSRNOT00000058143	TGGCATAGAGTTATCTTTCCT_x000D_;TGCTTCCCTCATTCATCC_x000D_	126_x000D_bp
Cryab	ENSRNOT00000059127	AATGGACCAAGGAAACAG_x000D_;AACGAGGAAAGGGAATCTA_x000D_	109_x000D_bp
Eva1c	ENSRNOT00000002838	AGCCGTTGCTAACCTAAAT_x000D_;CTGACAATAACGCCATCTTT_x000D_	105_x000D_bp
Fhl1	ENSRNOT00000084594	TGGAGCACCTAAGCAGAT_x000D_;TCACCGTGGCGAGTTTGT_x000D_	60_x000D_bp
Nos1	ENSRNOT00000066810	GGCGTCCGTGACTACTGT_x000D_;AAATCCATCTTCTTGGCTACT_x000D_	68_x000D_bp
Pitx3	ENSRNOT00000026013	GCGCTGTCATTGTCAGATGC_x000D_;TTCTCCGAGTCACTGTGCTCC_x000D_	86_x000D_bp
Stmn2	ENSRNOT00000015720	GCTGCTATCATTGAACGT_x000D_;GGATTTACTATGGGAGGG_x000D_	130_x000D_bp
Thbs4	ENSRNOT00000083531	AATACCATCCCTGCTACCC_x000D_;GGCATCACATCTGAAACCC_x000D_	65_x000D_bp
Rpl7	ENSRNOT00000009431	TGTAGAAGGTGGAGACGC_x000D_;AAATACCACGGGCAATAC_x000D_	86_x000D_bp
